# Supplementary material for: Rare, Serious, and Comprehensively Described Suspected Adverse Drug Reactions Reported by Surveyed Healthcare Professionals in Uganda
Source: PubMed Central journal article supplement (PMC4408100; doi:10.1371/journal.pone.0123974), 2015-04-23
Supplement: pone.0123974.s004.pdf [file pone.0123974.s004.pdf]

| Appendix S4: Survey-descriptions of 241 suspected Adverse Drug Reactions (ADRs) from 268 Healthcare Professionals (HCPs) who suspected ADRs in the past 4 weeks |      |                        |                   |          |          |        |                        |            |         |                                                                                                                                                                                            |
|-----------------------------------------------------------------------------------------------------------------------------------------------------------------|------|------------------------|-------------------|----------|----------|--------|------------------------|------------|---------|--------------------------------------------------------------------------------------------------------------------------------------------------------------------------------------------|
| file                                                                                                                                                            | id   | Level H/Facility       | Type H/Facility   | district | Region   | Cadre  | Nurse-cadre            | HCP-Gender | HCP-Age | Serious ADR Description                                                                                                                                                                    |
| <b>Antibacterials Only</b>                                                                                                                                      |      |                        |                   |          |          |        |                        |            |         |                                                                                                                                                                                            |
| 327                                                                                                                                                             | 843  | Private For-Profit     | Health Centre III | KAMPALA  | Central  | Doctor |                        | Male       | 39      | 35YR/FEMALE HYPERSENSITIVITY TO PENICILLINS                                                                                                                                                |
| 304                                                                                                                                                             | 1653 | Public                 | District Hospital | KAYUNGA  | Central  | Nurse  | Registered Midwife     | Female     | 42      | 28YRS, COTRIMOXAZOLE, SEVERE                                                                                                                                                               |
| 466                                                                                                                                                             | 464  | Private For-Profit     | Health Centre III | GULU     | Other/NK | Other  |                        | Male       | 26      | 32YR/FEMALE KNOWN ISS PATIENT ON COTRIMOXAZOLE CAME WITH SEVERE BODY RASHES & SLOUGHING. 18YR/MALE GIVEN IV FORTIFIED PROCAINE PENICILLIN (PPF) & SHE                                      |
|                                                                                                                                                                 | 1214 | Public                 | National Referral | KAMPALA  | Central  | Doctor |                        | Female     | 28      | PATIENT REACTED TO IV CEFTRIAZONE GOT PRURITUS AND ANGIOEDEMA INVOLVING THE MANDIBULAR AREA                                                                                                |
| 365                                                                                                                                                             | 103  | Private Not-for-Profit | Health Centre IV  | BUIKWE   | Central  | Other  |                        | Male       | 27      | 20YR/FEMALE ON PENICILIN GOT MILD REACTION                                                                                                                                                 |
|                                                                                                                                                                 | 183  | Public                 | National Referral | KAMPALA  | Central  | Nurse  | Registered Nurse       | Female     | 26      | PATIENT WAS ON CIPRO AND GOT SWOLLEN HANDS                                                                                                                                                 |
| 165                                                                                                                                                             | 982  | Private Not-for-Profit | Private Hospital  | KAMPALA  | Central  | Doctor |                        | Male       | 35      | BODY ITCHING,SWELLING &DISCOMFORT DUE TO CEPHALEXIN CAPS                                                                                                                                   |
| 313                                                                                                                                                             | 1662 | Public                 | District Hospital | KAYUNGA  | Central  | Nurse  | Registered Nurse       | Female     | 34      | MILD ADR.ELDERLY MALE PATIENT GOT ITCHING AFTER BENZYL PENICILIN BY IV ROUTE                                                                                                               |
| 417                                                                                                                                                             | 1692 | Private For-Profit     | Health Centre IV  | KAMPALA  | Central  | Nurse  | Enrolled Nurse         | Male       | 25      | ADULT WITH UTI GIVEN ORAL CIPROFLOXIN GOT ARTHRALGIA, MODERATE ABDOMINAL PAIN,VOMITING & RESTLESSNESS. SEVERE ADR.                                                                         |
|                                                                                                                                                                 | 20   | Public                 | National Referral | KAMPALA  | Central  | Doctor |                        | Male       | 26      | HIV+ PATIENT REACTED TO SEPTRIN PROPHYLAXIS AND GOT GENERALIZED SKIN RASH                                                                                                                  |
| 243                                                                                                                                                             | 1254 | Private Not-for-Profit | Other             | KAMPALA  | Central  | Nurse  | Registered Nurse       | Male       | 33      | ,RISE IN BODY TEMPERATURE & ITCHING WHICH INTENSIFIED ON SWALLOWING SEPTRIN                                                                                                                |
| 279                                                                                                                                                             | 80   | Public                 | National Referral | KAMPALA  | Central  | Doctor |                        | Male       | 35      | LOOSE STOOL,BODY ITCHING & URTICARIA WITH BLISTERING FOLLOWING USE OF PENICILINS                                                                                                           |
| 909                                                                                                                                                             | 1201 | Private Not-for-Profit | Private Hospital  | MBRA     | Other/NK | Pharm  |                        | Female     | 32      | 60YR-OLD ON ORAL COTRIMOXAZOLE - RASHES,NAUSEA & SEVERE INVISIBLE SWEATS,MODERATE RXN                                                                                                      |
|                                                                                                                                                                 | 1601 | Public                 | National Referral | KAMPALA  | Central  | Doctor |                        | Male       | 36      | DRUG REACTIONS TO ORAL SEPTRIN                                                                                                                                                             |
| 1043                                                                                                                                                            | 1074 | Public                 | Health Centre IV  | TORORO   | Eastern  | Nurse  | Registered Midwife     | Female     | 35      | 28YR OLD PATIENT WAS ADMINISTERED WITH COTRIMOXAZOLE TABLETS DEVELOPED BLACK PATCHES ON SKIN - MODERATE                                                                                    |
| 205                                                                                                                                                             | 949  | Public                 | Regional Referral | KAMPALA  | Central  | Doctor |                        | Male       | 28      | 26YR ANAEMIC FEMALE WITH SEVERE PRE-ECLAMPSIA FINALLY DELIVERED & WAS MANAGED POST-OPERATIVELY WITH GENTAMICIN-SUSTAINED ACUTE RENAL FAILURE WITH ANAEMIA FOR 5 DAYS & OTHER COMPLICATIONS |
| 325                                                                                                                                                             | 2034 | Private For-Profit     | Private Hospital  | WAKISO   | Central  | Nurse  | Enrolled Comprehensive | Female     |         | 18YR/FEMALE REACTED TO INTRAVENOUS CEFTRIAZONE BY SWELLING OF HAND THROUGH WHICH DRUG WAS GIVEN & SEVERE BACK PAIN-MILD                                                                    |
| 1040                                                                                                                                                            | 1071 | Private For-Profit     | Private Hospital  | TORORO   | Eastern  | Doctor |                        | Female     | 28      | A MAN DIAGNOSED WITH HIV TOOK COTRIMOXAZOLE AND GOT STEVENS-JOHNSON SYNDROME - SEVERE                                                                                                      |
| 185                                                                                                                                                             | 2006 | Private For-Profit     | Health Centre III | KAMPALA  | Central  | Other  |                        | Male       | 31      | 5YR OLD CHILD ON ORAL AMPICLOX (AMPICILLIN & CLOXACILLIN) DEVELOPED GENERALIZED RASHES. IT WAS MODERATE                                                                                    |
| 450                                                                                                                                                             | 447  | Public                 | Health Centre III | GULU     | Other/NK | Other  |                        | Male       | 30      | ADULT FEMALE ON ORAL COTRIMOXAZOLE GOT SWELLING AND ITCHY FACE.MILD                                                                                                                        |
| 1163                                                                                                                                                            | 888  | Private For-Profit     | Other             | MASAKA   | Other/NK | Nurse  | Enrolled Nurse         | Female     | 28      | 23YR OLD,FLAGYL,ITCHING & NAUSEA,MILD                                                                                                                                                      |
| 1061                                                                                                                                                            | 1092 | Public                 | District Hospital | TORORO   | Eastern  | Nurse  | Nursing Assistant      | Female     | 50      | A 20YR OLD TAKING SEPTRIN ORALLY GOT SEVERE SKIN RASH ALL OVER THE BODY                                                                                                                    |
| 809                                                                                                                                                             | 708  | Private Not-for-Profit | Private Hospital  | JINJA    | Eastern  | Nurse  | Nursing Assistant      | Female     | 27      | WOMAN ON SEPTRIN REACTED BY DEVELOPING GENERALIZED BODY RASH                                                                                                                               |
| 750                                                                                                                                                             | 649  | Public                 | Health Centre IV  | JINJA    | Eastern  | Other  |                        | Male       |         | 25YR/MALE REACTED TO IV AMPICILLIN.MODERATE.WAS GIVEN HYDROCORTISONE IV                                                                                                                    |
| 74                                                                                                                                                              | 42   | Private Not-for-Profit | Private Hospital  | KAMPALA  | Central  | Other  |                        | Male       | 26      | 30YR HIV+ MALE REACTED MODERATELY TO ORAL SEPTRIN PROPHYLAXIS                                                                                                                              |
| 758                                                                                                                                                             | 657  | Public                 | Health Centre III | JINJA    | Eastern  | Pharm  |                        | Female     | 26      | 25YR OLD FEMALE ON CIPROFLOXACIN IV. GOT SIS.IT WAS SEVERE                                                                                                                                 |
| 274                                                                                                                                                             | 2025 | Public                 | National Referral | KAMPALA  | Central  | Doctor |                        | Male       | 50      | 2YR OLD, CEFTRIAZONE, INTRAVENUS, MILD                                                                                                                                                     |

|      |      |                        |                   |         |          |        |                          |        |    |                                                                                                                                                                                              |
|------|------|------------------------|-------------------|---------|----------|--------|--------------------------|--------|----|----------------------------------------------------------------------------------------------------------------------------------------------------------------------------------------------|
| 606  | 824  | Public                 | District Hospital | MASINDI | Other/NK | Other  |                          | Male   | 24 | 5YR OLD ON COTRIMOXAZOLE REACTED TO THE DRUG & WAS CHANGED TO CAP AMOXYCILLIN. MODERATE                                                                                                      |
| 94   | 923  | Public                 | National Referral | KAMPALA | Central  | Nurse  | Other                    | Female | 48 | 2.5YR OLD BOY REACTED TO SEPTRIN                                                                                                                                                             |
| 957  | 142  | Public                 | Health Centre III | MITOOMA | Other/NK | Other  |                          | Male   | 27 | HIV+ PATIENT WITH BODY ACHES, SUDDEN SKIN RASH, BURNT SKIN, OOZING OF SWEAT-LIKE FLUID AFTER COTRIMOXAZOLE ADMINISTRATION - MILD SYMPTOMS                                                    |
| 791  | 690  | Private For-Profit     | Health Centre IV  | JINJA   | Eastern  | Doctor |                          | Male   | 30 | 21YR PATIENT REACTED TO PPF WITH VOMITING.TREATMENT CHANGED TO ERYTHOMYCIN 500MG                                                                                                             |
| 919  | 1211 | Private For-Profit     | Health Centre III | MBRA    | Other/NK | Doctor |                          | Male   | 47 | 32YR OLD HIV+ MALE STARTED ON COTRIMOXAZOLE ORALLY. IT WAS SEVERE.RECOVERED                                                                                                                  |
| 1096 | 1116 | Public                 | District Hospital | TORORO  | Eastern  | Nurse  | Registered Nurse         | Female | 29 | IV/IM PENICILLINS - MODERATE RASHES AND ITCHING                                                                                                                                              |
| 343  | 1687 | Private For-Profit     | Health Centre III | KAMPALA | Central  | Nurse  | Enrolled Comprehensive   | Female | 20 | 26YR OLD REACTED TO SEPTRIN. MODERATE REACTION                                                                                                                                               |
|      | 814  | Public                 | National Referral | KAMPALA | Central  | Doctor |                          | Female | 24 | PATIENT GOT RASH AFTER TAKING SEPTRIN PROPHYLAXIS                                                                                                                                            |
| 550  | 2041 | Public                 | National Referral | KAMPALA | Central  | Other  |                          | Male   | 32 | 62YR/FEMALE ON COTRIMOXAZOLE ORAL ROUTE WITHIN TWO DAYS GOT MULTIPLE SKIN PATCHES, DEVELOPED SORES ON MUCOUS MEMBRANES WITH HIGH TEMPERATURE. GIVEN STEROIDS & SHE RECOVERED                 |
| 597  | 815  | Public                 | District Hospital | MASINDI | Other/NK | Other  |                          | Male   | 35 | ADULT FEMALE GOT EXTENSIVE SKIN RASH, WAS ON STARTER SEPTRIN PROPHYLAXIS                                                                                                                     |
| 484  | 1314 | Private For-Profit     | Private Hospital  | KAMPALA | Central  | Nurse  | Registered Nurse         | Female | 35 | ADULT PATIENT HAD ABDOMINAL CRAMPS & URTICARIA RASH DUE TO IV VANCOMYCIN - MODERATE                                                                                                          |
| 784  | 683  | Private For-Profit     | Health Centre IV  | JINJA   | Eastern  | Nurse  | Nursing Assistant        | Male   | 25 | 29YR/FEMALE REACTED TO SEPTRIN - RASHES, GAVE HER DEXAMETHASONE AND PANADOL TO TREAT THE RASHES                                                                                              |
| 587  | 805  | Public                 | District Hospital | MASINDI | Other/NK | Nurse  | Registered Midwife       | Female | 32 | SEPTRIN                                                                                                                                                                                      |
| 876  | 1168 | Public                 | Health Centre III | MBRA    | Other/NK | Other  |                          | Male   | 32 | COTRIMOXAZOLE ORAL, MILD ADR                                                                                                                                                                 |
| 608  | 826  | Public                 | District Hospital | MASINDI | Other/NK | Other  |                          | Male   |    | 28YR/MALE - ALLERGIC REACTION TO ORAL CIPROFLOXACIN - SEVERE URTICARIA - SUBSTITUTED FOR CEPHALEXIN & CETIRIZINE. 30YR-OLD FEMALE REACTED TO NEVIRAPINE - MODERATE & WAS SUBSTITUTED FOR EFV |
|      | 1618 | Public                 | National Referral | KAMPALA | Central  | Doctor |                          | Male   | 26 | TWO PATIENTS GOT ITCHY RASH 20 MINUTES AFTER TRAMADOL INJECTION, 1 PATIENT DEVELOPED ITCHY RASH AFTER IM DICLOFENAC, 1 PATIENT GOT RASH AFTER IV CIPROFLOXACIN                               |
| 991  | 1023 | Private Not-for-Profit | Private Hospital  | TORORO  | Eastern  | Nurse  | Enrolled Comprehensive   | Male   | 20 | A MAN 35YRS WITH GENERALIZED SKIN RASH AFTER TAKING ORAL SEPTRIN - SEVERE                                                                                                                    |
| 76   | 48   | Private Not-for-Profit | Private Hospital  | KAMPALA | Central  | Pharm  |                          | Male   | 27 | 40YR MALE REACTED TO PENICILINS (FLUCLOXACILLIN-AMOXICILLIN COMBINATION) - GOT RASHES AFTER FIRST DOSE, REACTION WAS MODERATE                                                                |
| 53   | 906  | Private For-Profit     | Private Hospital  | KAMPALA | Central  | Doctor |                          | Male   | 45 | REDUCED BLOOD SUGAR & LOW PULSE AFTER TAKING CHLORAMPHENICOL INJECTION                                                                                                                       |
| 396  | 854  | Private For-Profit     | Private Hospital  | KAMPALA | Central  | Pharm  |                          | Female | 24 | REACTION TO CEFTRIAXONE WITH MILD INFLAMMATION & SWELLING AT POINT OF INJECTION. REACTION TO CIPROFLOACIN WITH SWELLING OF TONGUE.                                                           |
| 349  | 86   | Private For-Profit     | Health Centre IV  | BUIKWE  | Central  | Nurse  | Enrolled Comprehensive   | Male   | 25 | 58YR OLD ON ORAL COTRIMOXAZOLE GOT SEVERE URTICARIA AND SKIN RASHES ALL OVER THE BODY                                                                                                        |
| 904  | 1196 | Public                 | Health Centre IV  | MBRA    | Other/NK | Nurse  | Registered Nurse Midwife | Female | 50 | 29YR-OLD ON COTRIMOXAZOLE ORALLY, REACTION WAS MODERATE                                                                                                                                      |
| 990  | 1022 | Private Not-for-Profit | Private Hospital  | TORORO  | Eastern  | Other  |                          | Female | 25 | 38YR/MALE ON SEPTRIN DEVELOPED SJS - MODERATE                                                                                                                                                |
| 1002 | 1033 | Private For-Profit     | Health Centre IV  | TORORO  | Eastern  | Other  |                          | Male   | 27 | 8YR OLD BOY DEVELOPED ITCHY BODY RASH AND SWOLLEN EYES AFTER RECEIVING BENZYL PENICILLIN - MODERATE. RESOLVED WITHIN 1HR AFTER GIVING HYDROCORTISONE                                         |

|                             |      |                        |                   |          |          |        |                          |        |    |                                                                                                                                                                         |
|-----------------------------|------|------------------------|-------------------|----------|----------|--------|--------------------------|--------|----|-------------------------------------------------------------------------------------------------------------------------------------------------------------------------|
| 523                         | 496  | Public                 | Regional Referral | LIRA     | Other/NK | Doctor |                          | Female | 35 | 80YR OLD WOMAN REACTED TO COTRIMOXAZOLE.SKIN CHANGED BUT WAS A MILD CASE                                                                                                |
| 331                         | 847  | Private For-Profit     | Private Hospital  | KAMPALA  | Central  | Pharm  |                          | Male   | 30 | 24YR PATIENT REACTED TO PENICILLIN ORAL ROUTE,GOT GENERALIZED RASH AND BODY ITCHING                                                                                     |
| 61                          | 914  | Public                 | National Referral | KAMPALA  | Central  | Doctor |                          | Male   | 28 | REACTION TO SEPTIN PROPHYLAXIS IN A NEWLY DIAGNOSED HIV PATIENT STARTING SEPTIN DOSE                                                                                    |
| 154                         | 1868 | Private For-Profit     | Health Centre IV  | KAMPALA  | Central  | Other  |                          | Male   | 29 | 9YR OLD MALE GOT SKIN RASH AFTER TAKING ORAL PENICILLIN.ONSET WAS SUDDEN BUT RESOLVED AFTER USE OF TOPICAL HYDROCORTISONE CREAM                                         |
| 1058                        | 1089 | Public                 | District Hospital | TORORO   | Eastern  | Nurse  | Registered Nurse         | Female | 50 | 30YR OLD - SULPHUR REACTION-ORAL COTRIMOXAZOLE, SKIN RASH - MILD ; 40YR OLD NEVIRAPINE REACTION - SEVERE                                                                |
| 614                         | 832  | Public                 | District Hospital | MASINDI  | Other/NK | Nurse  | Registered Nurse Midwife | Female | 43 | 40YRS,SEPTIN,ORALLY.SJS                                                                                                                                                 |
| 465                         | 463  | Private For-Profit     | Private Hospital  | GULU     | Other/NK | Other  |                          | Female | 32 | 72YR/FEMALE REACTED TO BENZYL PENICILLIN WITH SHIVERS,ITCHY BODY RASHES & PROFUSE SWEATING IMMEDIATELY AFTER INJECTION - MODERATE                                       |
| 700                         | 598  | Private For-Profit     | Drug Shop         | KAMULI   | Eastern  | Nurse  | Enrolled Nurse           | Female | 28 | OLD WOMAN REACTED TO SEPTIN,GENERALIZED BODY SORES,GAVE HER PREDISOLONE & PAIN KILLER PLUS BETADERM TOPICAL (BETAMETHASONE)                                             |
| 953                         | 138  | Public                 | Health Centre III | SHEEMA   | Other/NK | Other  |                          | Male   | 38 | FEMALE 39YRS IV CEFTRIAZONE - MILD                                                                                                                                      |
| 1008                        | 1039 | Private For-Profit     | Private Hospital  | TORORO   | Eastern  | Nurse  | Nursing Assistant        | Female | 20 | 18YR OLD GIVEN IV CEFTRIAZONE. DRUG INJECTED VERY FAST & THE PATIENT DEVELOPED SEVERE VOMITING                                                                          |
| 724                         | 623  | Private For-Profit     | Drug Shop         | KAMULI   | Eastern  | Other  |                          | Male   | 36 | PATIENT ON SEPTIN ORAL ROUTE,DEVELOPED RASH ALL OVER BODY, TREATMENT WAS STOPPED                                                                                        |
| 411                         | 1371 | Private For-Profit     | Health Centre IV  | KIRYANDU | Other/NK | Nurse  | Enrolled Comprehensive   | Male   | 32 | 28YR OLD ON COTRIMOXAZOLE TAB TAKEN ORALLY,MODERATE ADR (HYPERSENSITIVITY)                                                                                              |
| 738                         | 637  | Public                 | Health Centre III | JINJA    | Eastern  | Nurse  | Enrolled Nurse           | Female | 20 | 26YR/MALE HIV+ ON ORAL SEPTIN,GOT BURNT FACE & LIPS-GIVEN ORAL DEXAMETHASONE FOR FIVE DAYS - SEVERE                                                                     |
| 87                          | 1626 | Public                 | National Referral | KAMPALA  | Central  | Doctor |                          | Male   | 30 | 1YR OLD GOT MILD REACTION TO COTRIMOXAZOLE FOR URTI                                                                                                                     |
|                             | 14   | Public                 | National Referral | KAMPALA  | Central  | Doctor |                          | Male   | 27 | SKIN REACTIONS FOLLOWING IV CEFTRIAZONE                                                                                                                                 |
| 329                         | 845  | Private Not-for-Profit | Health Centre III | KAMPALA  | Central  | Other  |                          | Male   | 26 | 30YR/MALE ON ORAL TINIDAZOLE GOT HEADACHE & DIZZINESS.IT WAS MILD                                                                                                       |
|                             | 2011 | Private For-Profit     | Health Centre III | WAKISO   | Central  | Doctor |                          | Female | 30 | CHILD ON IV CIPROFLOXACIN GOT BODY ITCH, SWELLING AROUND THE FACE & AROUND SITE OF THE INJECTION                                                                        |
| 182                         | 1263 | Private Not-for-Profit | Other             | KAMPALA  | Central  | Doctor |                          | Female | 25 | 24 YR PATIENT. VOMITING AFTER ORAL DOXYCYCLINE, MODERATE                                                                                                                |
| 59                          | 912  | Public                 | National Referral | KAMPALA  | Central  | Doctor |                          | Male   | 28 | VOMITING,IV CEFTRIAZONE-MODERATE                                                                                                                                        |
| <b>Antiretrovirals Only</b> |      |                        |                   |          |          |        |                          |        |    |                                                                                                                                                                         |
| 183                         | 818  | Public                 | National Referral | KAMPALA  | Central  | Nurse  | Registered Nurse         | Female | 32 | 50YR FEMALE PATIENT GOT NEVIRAPINE (ORAL) HYPERSENSITIVITY INVOLVING ALL MUCUS MEMBRANES,SEVERE BUT RESOLVED                                                            |
| 69                          | 922  | Public                 | National Referral | KAMPALA  | Central  | Nurse  | Registered Nurse Midwife | Female |    | 30YR PATIENT REACTED TO ART ADMINISTERED ORALLY. PATIENT LOST SKIN & MUCUS MEMBRANES-SEVERE                                                                             |
| 191                         | 2004 | Public                 | National Referral | KAMPALA  | Central  | Doctor |                          | Female | 32 | 36YR MALE ADMITTED WITH SJS FOLLOWING INITIATION OF ORAL NEVIRAPINE,SEVERE EVENT. 17YR OLD FEMALE ON ORAL AZITHROMYCIN GOT SKIN RASHES NECESSITATING ADMISSION-MODERATE |
| 192                         | 2005 | Public                 | National Referral | KAMPALA  | Central  | Other  |                          | Female | 30 | SKIN RASH IN A 45YR FEMALE PATIENT ON CBV/EFV/CTX FOR 2YRS TAKEN ORALLY. MODERATE. WAS REFERRED TO DERMATOLOGIST                                                        |
|                             | 825  | Public                 | National Referral | KAMPALA  | Central  | Doctor |                          | Male   | 38 | PT ON ALUVIA (LOPINAVIR & RITONAVIR) COMPLAINED OF DRY MOUTH AND THROAT DISCOMFORT                                                                                      |
|                             | 1807 | Public                 | National Referral | KAMPALA  | Central  | Doctor |                          | Male   | 29 | ISS PATIENT WITH SKIN RASH,SCALING,ULCERATIONS FOR 2WKS THAT STARTED 1WK AFTER ART INITIATION OF COMBIVIR-NEVIRAPINE (AZT/3TC/NVP)                                      |

|      |      |                        |                   |         |          |        |                        |        |    |                                                                                                                                                                                 |
|------|------|------------------------|-------------------|---------|----------|--------|------------------------|--------|----|---------------------------------------------------------------------------------------------------------------------------------------------------------------------------------|
| 39   | 1625 | Public                 | National Referral | KAMPALA | Central  | Doctor |                        | Male   | 28 | PATIENT ON POST-EXPOSURE-PROPHYLAXIS (CBV/EFV) PRESENTS WITH EUPHORIA & DECREASED SLEEP: EFV-INDUCED NEUROPSYCHIATRIC MOOD                                                      |
|      | 2019 | Private Not-for-Profit | Private Hospital  | WAKISO  | Central  | Doctor |                        | Male   | 27 | HIV+/FEMALE NEWLY ENROLLED ON HAART WITH NVP-BASED REGIMEN DEVELOPED SJS WHICH WAS SEVERE                                                                                       |
| 1159 | 884  | Public                 | Regional Referral | MASAKA  | Other/NK | Pharm  |                        | Female |    | ORAL NEVIRAPINE, MODERATE REACTION, DRUG WITHHELD & PATIENT STABILIZED                                                                                                          |
| 403  | 1287 | Public                 | Health Centre III | KAMPALA | Central  | Doctor |                        | Female | 39 | PERIPHERAL NEUROPATHY DUE TO AZT                                                                                                                                                |
| 370  | 109  | Private Not-for-Profit | District Hospital | BUIKWE  | Central  | Nurse  | Registered Nurse       | Female | 25 | MILD ADR.PATIENT ON ORAL EFV HAD GYNAECOMASTIA AND JERKS                                                                                                                        |
| 1034 | 1065 | Private Not-for-Profit | District Hospital | TORORO  | Eastern  | Nurse  | Registered Nurse       | Male   | 25 | MOTHER REPORTED CONVULSIONS WHENEVER THE CHILD TOOK HIS ORAL ARVS - MODERATE                                                                                                    |
| 486  | 1289 | Public                 | National Referral | KAMPALA | Central  | Doctor |                        | Female | 29 | 4YR OLD, EFAVIRENZ-ORAL ROUTE-MODERATE ADR                                                                                                                                      |
| 402  | 1273 | Private For-Profit     | Private Hospital  | KAMPALA | Central  | Pharm  |                        | Male   | 25 | 30YR/FEMALE ON AZT/3TC/NVP GOT BODY RASH & ITCHING AFTER 2WEEKS.MODERATE ADR                                                                                                    |
| 887  | 1179 | Private For-Profit     | Private Hospital  | MBRA    | Other/NK | Pharm  |                        | Male   | 30 | 35YRS ORAL EFV LED TO MODERATE MENTAL DISTURBANCE, SUBSTITUTN REDUCED IT                                                                                                        |
| 409  | 1368 | Private For-Profit     | Private Hospital  | KIRYAND | Other/NK | Other  |                        | Female | 27 | 35YR/FEMALE, WITH CD4 100 CELLS/DL ON AZT/3TC/NVP, AFTER 2WEEKS SHE CAME BACK WITH A SEVERE GENERALIZED BODY RASH                                                               |
| 1157 | 882  | Public                 | Health Centre III | MASAKA  | Other/NK | Other  |                        | Female | 27 | 32YR OLD REACTED TO ORAL NEVIRAPINE - SJS. REACTION WAS MODERATE                                                                                                                |
| 63   | 916  | Private Not-for-Profit | Health Centre IV  | KAMPALA | Central  | Doctor |                        | Female | 32 | NVP SKIN HYPERSENSITIVITY                                                                                                                                                       |
| 430  | 426  | Private Not-for-Profit | Private Hospital  | GULU    | Other/NK | Nurse  | Registered Nurse       | Female | 36 | 27YR/FEMALE ON PEP ORAL ROUTE GOT BLISTERS 3 DAYS LATER WITH BURNING SENSATION ALL-OVER THE BODY.MODERATE                                                                       |
|      | 402  | Public                 | National Referral | KAMPALA | Central  | Pharm  |                        | Male   |    | SKIN RASH DUE TO NEVIRAPINE TABLETS                                                                                                                                             |
| 1057 | 1088 | Public                 | District Hospital | TORORO  | Eastern  | Nurse  | Registered Nurse       | Female | 48 | 32YR/FEMALE ISS PATIENT ON AZT/3TC/NVP FOR 3 MONTHS GOT SKIN RASH ALL OVER THE BODY - STEVEN JOHNSON SYNDROME - SEVERE                                                          |
| 723  | 622  | Private For-Profit     | Drug Shop         | KAMULI  | Eastern  | Doctor |                        | Male   | 28 | 27YR/FEMALE ON ORAL DUOVIR-N (AZT/3TC/NVP) DEVELOPED SWELLING & ITCHING. WAS MODERATE                                                                                           |
| 495  | 863  | Private Not-for-Profit | Private Hospital  | KAMPALA | Central  | Doctor |                        | Male   | 24 | 38YR OLD FEMALE WITH SEVERE NEVIRAPINE HYPERSENSITIVITY                                                                                                                         |
| 628  | 526  | Public                 | District Hospital | KAMULI  | Eastern  | Other  |                        | Male   | 30 | 37YR OLD GOT SJS AFTER TAKING ARVS. WAS LATER GIVEN IV FLUID ANTIBIOTICS, STEROID DRUGS & SUPPORTIVE TREATMENT                                                                  |
| 1009 | 1040 | Private For-Profit     | Other             | TORORO  | Eastern  | Other  |                        | Male   | 32 | 45YR/FEMALE DEVELOPED DEEP JAUNDICE (HEPATOTOXICITY) AFTER RECEIVING ORAL NEVIRAPINE. WAS GIVEN EFV AS ALTERNATIVE DRUG AND SHE IMPROVED                                        |
| 187  | 2008 | Public                 | District Hospital | KAMPALA | Central  | Doctor |                        | Female | 33 | 28YR FEMALE ON ORAL DUOVIR-N (AZT/3TC/NVP), GOT RASH WHICH WORSENER & SHE DEVELOPED SJS                                                                                         |
| 910  | 1202 | Private For-Profit     | Private Hospital  | MBRA    | Other/NK | Pharm  |                        | Male   | 27 | 24 YR-OLD WITH SKIN PEELING OFF DUE TO NEVIRAPINE, REACTION WAS SEVERE                                                                                                          |
| 326  | 2035 | Private For-Profit     | Private Hospital  | WAKISO  | Central  | Doctor |                        | Female |    | ORAL ADMINISTRATION OF NEVIRAPINE IN PATIENT LEADING TO HEPATOTOXITY                                                                                                            |
| 506  | 1013 | Private Not-for-Profit | Private Hospital  | WAKISO  | Central  | Other  |                        | Male   | 33 | 26YR OLD ON ARVS (AZT+3TC-NVP) MODERATE ITCHY SKIN RASH-RESOLVED AFTER DISCONTINUATION OF ART. 16YR OLD WITH URTICARIA DUE TO AMOXICILLIN - MILD ADR. WAS GIVEN HYDROCORTISONE. |
| 563  | 781  | Public                 | District Hospital | MASINDI | Other/NK | Other  |                        | Male   | 25 | 27YR OLD WITH 237 CD4 CELLS/ML ON NEVIRAPINE ORAL ROUTE GOT SEVERE RASH                                                                                                         |
| 170  | 64   | Private For-Profit     | Private Hospital  | KAMPALA | Central  | Doctor |                        | Male   | 24 | 25YR-OLD ANAEMIC, AZT                                                                                                                                                           |
| 987  | 1019 | Private Not-for-Profit | Private Hospital  | TORORO  | Eastern  | Nurse  | Enrolled Comprehensive | Female | 22 | 38YR OLD IMMEDIATELY AFTER STARTING ORAL ARVS FELT LIKE HOT WATER HAD BEEN Poured ON HIM - SEVERE                                                                               |
| 626  | 524  | Public                 | District Hospital | KAMULI  | Eastern  | Nurse  | Enrolled Nurse         | Female | 24 | 42YR OLD WOMAN REACTED TO ARVS, TREATED WITH ANTIBIOTICS, THAT IS, CEFTRIAXONE                                                                                                  |
| 1165 | 890  | Public                 | Regional Referral | MASAKA  | Other/NK | Other  |                        | Female |    | NVP RASH                                                                                                                                                                        |

|      |      |                           |                   |         |          |        |                          |        |    |                                                                                                                                                       |
|------|------|---------------------------|-------------------|---------|----------|--------|--------------------------|--------|----|-------------------------------------------------------------------------------------------------------------------------------------------------------|
| 951  | 136  | Public                    | Health Centre IV  |         | Other/NK | Pharm  |                          | Female | 27 | 35 YR-OLD ISS PATIENT ON AZT/3TC/NVP GOT SKIN RASH MORE SEVERE ON LOWER LIMBS & SKIN STARTED PEELING OFF, DID NOT RESPOND TO STEROIDS OR ANTIFUNGALS  |
| 1067 | 1098 | Public                    | District Hospital | TORORO  | Eastern  | Doctor |                          | Female | 28 | 4YR HIV+ CHILD ON PROTEASE INHIBITORS SWITCHED TO ORAL EFV - SEVERE BEHAVIORAL DISTURBANCE INCLUDING AGGRESSION, INSOMNIA & HYPERACTIVITY             |
| 786  | 685  | Private For-Profit        | Other             | JINJA   | Eastern  | Other  |                          | Male   | 29 | ADR WAS DUE TO NEVIRAPINE WHILE PATIENT RECEIVED ART                                                                                                  |
| 123  | 1839 | Private For-Profit        | Private Hospital  | KAMPALA | Central  | Other  |                          | Male   | 27 | ORAL NEVIRAPINE INDUCED RASH-SJS IN 26YR PATIENT. REACTION TO EFAVIRENZ CAUSING AUDITORY & VISUAL HALLUCINATIONS                                      |
| 471  | 469  | Public                    | National Referral | GULU    | Other/NK | Nurse  | Registered Nurse         | Female | 40 | 30YR ON AZT ORAL ROUTE GOT BODY RASH, FEVER, & ITCHING- MODERATE                                                                                      |
| 423  | 419  | Private Not-for-Profit    | Regional Referral | GULU    | Other/NK | Pharm  |                          | Female | 26 | 22YR/FEMALE LADY NURSE WHO GOT NEEDLE STICK INJURY & WAS INITIATED ON PEP WITH AZT/3TC-12 DAYS LATER GOT SEVERE RASH (SJS) & WAS ADMITTED AND TREATED |
| 612  | 830  | Public                    | District Hospital | MASINDI | Other/NK | Nurse  | Registered Nurse         | Female | 33 | 45YR PATIENT ON ORAL TDF/3TC/NVP GOT SEVERE ABDOMINAL PAIN WHICH WAS IN COLICKY FORM                                                                  |
| 613  | 831  | Public                    | District Hospital | MASINDI | Other/NK | Other  |                          | Female | 36 | 39YR/FEMALE ON ZIDOVIDINE ORAL ROUTE GOT ANAEMIA. SHE WAS BLOOD TRANSFUSED & AZT WAS REPLACED WITH TENOFOVIR                                          |
| 1161 | 886  | Public                    | Regional Referral | MASAKA  | Other/NK | Other  |                          | Female | 42 | NVP RASHES, AZT ANEMIA, ATAZANAVIR HEPATOTOXICITY JAUNDICE                                                                                            |
| 1158 | 883  | Public                    | Regional Referral | MASAKA  | Other/NK | Nurse  | Registered Comprehensive | Female |    | ORAL NEVIRAPINE, SEVERE HEADACHE, PATIENT STABILIZED                                                                                                  |
| 603  | 821  | Public                    | District Hospital | MASINDI | Other/NK | Other  |                          | Male   | 38 | 35YR ON AZT-CONTAINING REGIMEN ORAL ROUTE DEVELOPED SEVERE ANAEMIA LEADING TO ADMISSION & BLOOD TRANSFUSION                                           |
|      |      | <b>Antimalarials Only</b> |                   |         |          |        |                          |        |    |                                                                                                                                                       |
| 992  | 1024 | Private Not-for-Profit    | Private Hospital  | TORORO  | Eastern  | Nurse  | Enrolled Nurse           | Female | 27 | A CHILD OF 5YRS AFTER INTRAVENOUS QUININE. SHE DIED AFTER ARRIVAL                                                                                     |
| 152  | 1866 | Private For-Profit        | Health Centre IV  | KAMPALA | Central  | Other  |                          | Male   | 34 | SWELLING OF FACE IN 16YR PATIENT AFTER SWALLOWING COARTEM (ORALLY)-MODERATE                                                                           |
| 567  | 785  | Private Not-for-Profit    | Private Hospital  | MASINDI | Other/NK | Nurse  | Enrolled Comprehensive   | Female | 23 | 4YR OLD ON COARTEM ORAL ROUTE. MODERATE REACTION                                                                                                      |
|      | 175  | Public                    | Health Centre III | TORORO  | Eastern  | Nurse  | Registered Nurse         | Female | 25 | ITCHING OF SKIN AFTER TAKING ORAL CHLOROQUINE, ANOTHER GOT RASH AFTER TAKING ORAL COARTEM                                                             |
| 682  | 580  | Private For-Profit        | Drug Shop         | KAMULI  | Eastern  | Nurse  | Nursing Assistant        | Male   | 40 | 55YR OLD MALE ON QUININE TABS ORAL ROUTE GOT BODY ITCHING                                                                                             |
| 783  | 682  | Private For-Profit        | Drug Shop         | JINJA   | Eastern  | Nurse  | Enrolled Nurse           | Female | 18 | MAN REACTED TO FANSIDAR IV-VOMITING. TREATMENT WAS PLASIL AND WATER                                                                                   |
| 522  | 495  | Public                    | Regional Referral | LIRA    | Other/NK | Nurse  | Registered Nurse         | Female | 27 | 26YR/MALE ON COARTEM ORAL ROUTE, RASH ON BOTH HANDS, ITCHING & SWELLING                                                                               |
| 705  | 603  | Private For-Profit        | Drug Shop         | KAMULI  | Eastern  | Nurse  | Nursing Assistant        | Female | 26 | CHILDREN REACTED TO CHLOROQUINE WITH BODY ITCHING, WERE GIVEN DEXAMETHASONE TO STOP THE REACTION                                                      |
| 869  | 767  | Public                    | Regional Referral | JINJA   | Eastern  | Nurse  | Registered Nurse         | Female | 32 | 3YR OLD CHILD GIVEN IV QUININE & SHE BECAME HYPOGLYCAEMIC                                                                                             |
| 799  | 698  | Private Not-for-Profit    | Health Centre IV  | JINJA   | Eastern  | Doctor |                          | Male   | 24 | 52YR OLD FEMALE ON COARTEM ORAL ROUTE DEVELOPED SORES ON THE WHOLE BODY                                                                               |
| 986  | 1017 | Private Not-for-Profit    | Private Hospital  | TORORO  | Eastern  | Nurse  | Enrolled Comprehensive   | Male   | 24 | 2YR OLD GIVEN IM QUININE DEVELOPED HYPOGLYCAEMIA - IMPROVED AFTER MANAGEMENT - SEVERE                                                                 |
| 82   | 54   | Private Not-for-Profit    | Private Hospital  | KAMPALA | Central  | Pharm  |                          | Male   | 34 | MILD SULPHUR REACTION TO ORAL TREATMENT WITH SULFADOXINE-PYRIMETHAMINE (SP) AGE-ADULT                                                                 |
| 624  | 522  | Public                    | District Hospital | KAMULI  | Eastern  | Nurse  | Enrolled Nurse           | Male   | 47 | 2YR OLD BOY WAS BROUGHT TO HOSPITAL WITH A REACTION TO QUININE & DOCTOR GAVE HIM AN ANTIDOTE BUT HE DIED                                              |
| 914  | 1206 | Private Not-for-Profit    | Private Hospital  | MBRA    | Other/NK | Nurse  | Enrolled Nurse           | Female | 60 | 17YR-OLD ON IM QNN WITH POST INJECTION PARALYSIS, IT WAS SEVERE                                                                                       |

|      |      |                        |                   |         |          |        |                          |        |    |                                                                                                                                                                               |
|------|------|------------------------|-------------------|---------|----------|--------|--------------------------|--------|----|-------------------------------------------------------------------------------------------------------------------------------------------------------------------------------|
| 26   | 1810 | Private For-Profit     | Health Centre III | KAMPALA | Central  | Doctor |                          | Male   | 35 | TINNITUS IN A 27YR-OLD AFTER IV QUININE. SEVERE (LED TO ALTERED CONSCIOUSNESS).                                                                                               |
| 771  | 670  | Private For-Profit     | Pharmacy          | JINJA   | Eastern  | Pharm  |                          | Female | 35 | PATIENT REACTED TO QUININE WITH ITCHING, TREATED IT WITH CETIRIZINE                                                                                                           |
| 888  | 1180 | Private Not-for-Profit | Private Hospital  | MBRA    | Other/NK | Nurse  | Enrolled Nurse           | Female | 50 | PATIENT ON ORAL QNN GOT SKIN RASH, TINNITUS, ABORTION, VERTIGO, NAUSEA, VOMITING, BLURRED VISION - SEVERE                                                                     |
| 707  | 605  | Private For-Profit     | Health Centre IV  | KAMULI  | Eastern  | Nurse  | Nursing Assistant        | Female | 21 | 25YR ON QUININE ORAL ROUTE, MILD, ADVISED HIM TO DRINK A LOT OF FLUIDS & TO TAKE PAIN KILLERS                                                                                 |
| 1073 | 1104 | Private For-Profit     | Other             | TORORO  | Eastern  | Other  |                          | Male   | 38 | A FOUR-AND-A-HALF-YEAR-OLD CHILD TOOK CHLOROQUINE & DEVELOPED SKIN RASHES - MODERATE                                                                                          |
| 570  | 788  | Private For-Profit     | Health Centre IV  | MASINDI | Other/NK | Doctor |                          | Male   | 62 | 62YR/FEMALE ON ORAL MEPHAQUINE GOT SEVERE HEADACHE WITH MENTAL CONFUSION & INSOMNIA                                                                                           |
| 851  | 749  | Private For-Profit     | Drug Shop         | JINJA   | Eastern  | Nurse  | Registered Midwife       | Male   | 30 | 28YR OLD FEMALE REACTED TO QUININE IV LEADING TO MISCARRIAGE                                                                                                                  |
| 259  | 987  | Private For-Profit     | Health Centre III | KAMPALA | Central  | Other  |                          | Male   | 32 | 28YR/FEMALE GOT BODY ITCHING AFTER TAKING ORAL QUININE. ADR WAS MODERATE                                                                                                      |
| 398  | 856  | Private For-Profit     | Private Hospital  | KAMPALA | Central  | Doctor |                          | Female | 34 | PATIENT PUT ON IV ARTHEMETHER, GOT GENERALIZED ITCHY SKIN RASH ABOUT 1 HOUR AFTER INJECTION. WAS MILD                                                                         |
| 5    | 34   | Private Not-for-Profit | Health Centre IV  | KAMPALA | Central  | Nurse  | Registered Midwife       | Female | 26 | VOMITING & IRRITABILITY AFTER IV QUININE ADMINISTRATION BUT LATER STABILISED. REACTIONS WERE MILD.                                                                            |
| 49   | 902  | Public                 | Health Centre IV  | KAMPALA | Central  | Doctor |                          | Male   |    | SEVERE HYPOGLYCEMIA IN ADULT-DRUG WAS ARTESUNATE/AMODIAQUINE                                                                                                                  |
| 359  | 97   | Private Not-for-Profit | Other             | BUIKWE  | Central  | Doctor |                          | Male   | 52 | PATIENT 52YR B/S +VE FOR MALARIA PARASITES. GIVEN COARTEM FOR THREE DAYS' TREATMENT, AFTER 1 DAY GOT SKIN ITCHING & SEVERE RASH. STOPPED DRUG, GAVE IV QNN & PATIENT IMPROVED |
| 1109 | 1129 | Public                 | District Hospital | TORORO  | Eastern  | Doctor |                          | Female | 27 | 9-MONTH-OLD BABY ON ORAL COARTEM - VOMITING BUT RESOLVED. MILD REACTION                                                                                                       |
| 1052 | 1083 | Public                 | Health Centre IV  | TORORO  | Eastern  | Other  |                          | Male   | 24 | 36YR OLD ON ORAL FANSIDAR (SULPHADOXINE/PYRIMETHAMINE) DEVELOPED HYPERPIGMENTATION OF THE SKIN & THE THROAT - MILD                                                            |
|      |      | <b>Analgesics Only</b> |                   |         |          |        |                          |        |    |                                                                                                                                                                               |
| 278  | 2029 | Private For-Profit     | Private Hospital  | KAMPALA | Central  | Doctor |                          | Male   | 28 | ORAL DICLOFENAC 50MG, HAEMOPTYSIS AFTER 2 DAYS - WAS SEVERE. DUOCOTEXCIN - VOMITING UNNECESSARILY                                                                             |
|      | 176  | Private Not-for-Profit | Private Hospital  | KAMPALA | Central  | Doctor |                          | Male   | 30 | SKIN ITCHING SECONDARY TO OPIOID USE                                                                                                                                          |
| 171  | 65   | Private Not-for-Profit | District Hospital | KAMPALA | Central  | Nurse  | Registered Nurse Midwife | Female | 38 | 28YR FEMALE PATIENT GIVEN IM MORPHINE, GOT GENERALIZED SKIN ITCHING OF MODERATE SEVERITY                                                                                      |
| 332  | 1672 | Private For-Profit     | Private Hospital  | KAMPALA | Central  | Other  |                          | Male   | 30 | ORAL ROUTE OF TRAMADOL RESULTED INTO SEVERE ITCHY SORES ALL-OVER THE BODY THAT PERSISTED                                                                                      |
| 390  | 848  | Private For-Profit     | Other             | KAMPALA | Central  | Doctor |                          | Female | 60 | MILD DYSPEPSIA FROM ADULTS USING ORAL ANALGESICS FOR ATHRITIS                                                                                                                 |
| 878  | 1170 | Private For-Profit     | Private Hospital  | MBRA    | Other/NK | Nurse  | Registered Comprehensive | Female | 23 | 23YR MALE TOOK IBUPROFEN GOT GENERALIZED SKIN RASH & ITCHING ALL-OVER THE BODY; IT WAS MODERATE. TREATED WITH IV HYDROCORTISONE                                               |
| 574  | 792  | Private Not-for-Profit | Health Centre IV  | MASINDI | Other/NK | Nurse  | Enrolled Comprehensive   | Male   | 22 | 25YR OLD ON IV TRAMADOL 100MG, DEVELOPED PALPITATIONS & SWEATING BUT GOT BETTER AFTER 20 MINUTES - MILD                                                                       |
| 175  | 69   | Private Not-for-Profit | District Hospital | KAMPALA | Central  | Doctor |                          | Male   |    | IV PETHIDINE GIVEN TWICE CAUSED A SKIN REACTION                                                                                                                               |
| 511  | 484  | Public                 | Regional Referral | LIRA    | Other/NK | Pharm  |                          | Male   | 38 | 26YR/FEMALE HAD A HISTORY OF PEPTIC ULCER DISEASE - DUE TO INDOMETHACIN BUT WAS NOT SEVERE                                                                                    |
| 725  | 624  | Private For-Profit     | Health Centre IV  | KAMULI  | Eastern  | Nurse  | Enrolled Nurse           | Female | 56 | 16YR OLD BOY TOOK OVERDOSE OF IBUPROFEN (20 TABLETS). PUT HIM ON A DRIP & HE RECOVERED.                                                                                       |

|                                                     |      |                        |                   |         |          |        |                          |        |    |                                                                                                                                                                                   |
|-----------------------------------------------------|------|------------------------|-------------------|---------|----------|--------|--------------------------|--------|----|-----------------------------------------------------------------------------------------------------------------------------------------------------------------------------------|
| 927                                                 | 1219 | Private For-Profit     | Pharmacy          | MBRA    | Other/NK | Pharm  |                          | Male   | 25 | GASTROINTESTINAL DISTRESS DUE TO NSAID-INDUCED ULCERATION AFTER ORAL DICLOFENAC                                                                                                   |
| 453                                                 | 450  | Public                 | National Referral | GULU    | Other/NK | Doctor |                          | Female | 35 | 41YR/MALE GIVEN PANADOL (PARACETAMOL), STARTED SHAKING & SWEATING 10 MINUTES LATER.WAS PUT ON A DRIP AND HE BECAME FINE.                                                          |
| 518                                                 | 491  | Public                 | Regional Referral | LIRA    | Other/NK | Doctor |                          | Female | 40 | 10YR/MALE REACTED TO PANADOL (PARACETAMOL) WHEN TOOTH WAS REMOVED,BECAME DIZZY-MINOR                                                                                              |
| 1038                                                | 1069 | Private For-Profit     | Private Hospital  | TORORO  | Eastern  | Nurse  | Registered Comprehensive | Female | 29 | 65YR/FEMALE PATIENT'S BLOOD PRESSURE LOWERED FROM 105/60 TO 86/50 MMHG & STARTED SWEATING AT A TEMPERATURE OF 35.0 DEGREES CELSIUS DUE TO DYNAPAR (IV DICLOFENAC INFUSION) - MILD |
|                                                     | 16   | Public                 | National Referral | KAMPALA | Central  | Pharm  |                          | Male   | 25 | PATIENT DEVELOPED PEPTIC ULCER DISEASE A FEW DAYS AFTER TAKING ACECLOFENAC                                                                                                        |
| <b>Antituberculosis drugs Only</b>                  |      |                        |                   |         |          |        |                          |        |    |                                                                                                                                                                                   |
| 502                                                 | 1008 | Private Not-for-Profit | Private Hospital  | KAMPALA | Central  | Nurse  | Enrolled Comprehensive   | Male   | 30 | 40YR OLD ON ETHAMBUTOL ORAL ROUTE GOT BURNING SENSATION OF BOTH LIMBS & LOSS OF SIGHT - MODERATE SEVERITY                                                                         |
|                                                     | 1611 | Public                 | National Referral | KAMPALA | Central  | Doctor |                          | Male   | 26 | GENERALIZED BODY RASH FOLLOWING USE OF ANTI-TBS                                                                                                                                   |
| <b>Antibacterials &amp; Antiretrovirals</b>         |      |                        |                   |         |          |        |                          |        |    |                                                                                                                                                                                   |
| 949                                                 | 134  | Public                 | Health Centre IV  |         | Other/NK | Nurse  | Registered Nurse         | Male   |    | WOMAN AGED 30YRS ON NEVIRAPINE & COTRIMOXAZOLE WHO DEVELOPED A SKIN RASH                                                                                                          |
| <b>Antibacterials &amp; Antimalarials</b>           |      |                        |                   |         |          |        |                          |        |    |                                                                                                                                                                                   |
| 160                                                 | 1874 | Private For-Profit     | Health Centre IV  | KAMPALA | Central  | Doctor |                          | Female |    | 19YR FEMALE PATIENT WITH MALARIA & COUGH REACTED SEVERELY TO COMBINATION OF QNN-IV & ORAL SEPTRIN. MANAGED WITH PARENTERAL HYDROCORTISONE                                         |
| 996                                                 | 1027 | Private Not-for-Profit | Private Hospital  | TORORO  | Eastern  | Nurse  | Enrolled Comprehensive   | Female | 30 | 5YR OLD GIRL FROM A CLINIC WHERE SHE WAS PUT ON IV QUININE & SEPTRIN. GOT BLISTERS ALL OVER THE BODY & DIED ON ADMISSION - SEVERE                                                 |
| 988                                                 | 1020 | Private Not-for-Profit | Private Hospital  | TORORO  | Eastern  | Nurse  | Enrolled Comprehensive   | Female | 27 | 8YR OLD GIRL REFERRED FROM A CLINIC AFTER RECEIVING IV QUININE & SEPTRIN DEVELOPED BLISTERS ALL-OVER THE BODY & DIED ON ADMISSION - SEVERE                                        |
| 1047                                                | 1078 | Private Not-for-Profit | Private Hospital  | TORORO  | Eastern  | Nurse  | Nursing Assistant        | Female | 29 | 5YR OLD GIRL WAS REFERRED FROM A CLINIC AFTER TAKING IV QUININE & SEPTRIN WITH BLISTERS ALL-OVER THE BODY. SHE DIED ON ADMISSION - SEVERE                                         |
| <b>Antiretrovirals &amp; Antituberculosis drugs</b> |      |                        |                   |         |          |        |                          |        |    |                                                                                                                                                                                   |
| 194                                                 | 984  | Public                 | National Referral | KAMPALA | Central  | Nurse  | Registered Nurse         | Female | 37 | 37YR FEMALE PATIENT ON ORAL ARVS/TB GOT ENTIRE BODY RASH                                                                                                                          |
| <b>Antibacterials and Antituberculosis drugs</b>    |      |                        |                   |         |          |        |                          |        |    |                                                                                                                                                                                   |
| 253                                                 | 994  | Public                 | National Referral | KAMPALA | Central  | Nurse  | Registered Nurse Midwife | Female | 60 | ADULT SEVERELY REACTED TO SEPTRIN AND TB DRUGS TAKEN ORALLY                                                                                                                       |
| 197                                                 | 941  | Private Not-for-Profit | Private Hospital  | KAMPALA | Central  | Doctor |                          | Male   | 26 | 24YR/FEMALE KNOWN IMMUNOSUPPRESSED SYNDROME (ISS) PATIENT ON ANTI-TBS WHO REACTED TO COTRIMOXAZOLE - SJS & ALSO HAD TOXOPLASMOSIS                                                 |
| 301                                                 | 1650 | Private For-Profit     | Health Centre III | KAYUNGA | Central  | Nurse  | Enrolled Nurse           | Female |    | ELDERLY PATIENT ON PIROXICAM COMPLAINED OF HEART PAIN WHICH INDICATED PUD & ALSO GOT OEDEMA DUE TO PENICILLINS                                                                    |
| 227                                                 | 842  | Public                 | National Referral | KAMPALA | Central  | Doctor |                          | Male   | 30 | 30YR/FEMALE PATIENT GIVEN IM MORPHINE & IV CEFTRIAXONE AFTER CAESARIAN-SECTION. GOT GENERALIZED BODY RASH & ITCHING 15MIN LATER                                                   |
| <b>Antiseptic &amp; Anaesthetic</b>                 |      |                        |                   |         |          |        |                          |        |    |                                                                                                                                                                                   |
| 163                                                 | 1877 | Public                 | National Referral | KAMPALA | Central  | Doctor |                          | Male   | 34 | 28YR FEMALE REACTED TO ORACURE GEL (LIGNOCAINE & CETYLPYRIDINIUM) FOR ORAL SORES-GOT SWOLLEN LIPS/TONGUE                                                                          |
| <b>Antibacterial &amp; Antiviral</b>                |      |                        |                   |         |          |        |                          |        |    |                                                                                                                                                                                   |

|                                       |      |                        |                   |         |          |        |                          |        |    |                                                                                                                                                                                        |
|---------------------------------------|------|------------------------|-------------------|---------|----------|--------|--------------------------|--------|----|----------------------------------------------------------------------------------------------------------------------------------------------------------------------------------------|
| 913                                   | 1205 | Private Not-for-Profit | Private Hospital  | MBRA    | Other/NK | Doctor |                          | Male   | 41 | 74YR-OLD WITH CORNEAL ULCER NOT RESPONDING TO TOPICAL ANTIBIOTICS & ANTIVIRALS FOR 14 DAYS. STOPPED THE MEDICATION AND LEFT PATIENT ON ARTIFICIAL TEARS ONLY & NOTED GREAT IMPROVEMENT |
| <b>Antiretroviral &amp; Analgesic</b> |      |                        |                   |         |          |        |                          |        |    |                                                                                                                                                                                        |
|                                       | 19   | Public                 | National Referral | KAMPALA | Central  | Pharm  |                          | Male   | 24 | OVER DOSAGE OF NSAIDS AND PROTEASE INHIBITORS FROM PHYSICIANS WHO DONT CONSULT PHARMARCISTS                                                                                            |
| <b>Antibacterial &amp; Blood</b>      |      |                        |                   |         |          |        |                          |        |    |                                                                                                                                                                                        |
|                                       | 1225 | Public                 | National Referral | KAMPALA | Central  | Doctor |                          | Male   | 25 | HYPERSENSITIVITY REACTION TO SEPTRIN & BLOOD                                                                                                                                           |
| <b>Other</b>                          |      |                        |                   |         |          |        |                          |        |    |                                                                                                                                                                                        |
| 110                                   | 1252 | Public                 | National Referral | KAMPALA | Central  | Nurse  | Enrolled Midwife         | Female | 51 | PROLONGED HEAVY FLOW,INCREASED BLOOD PRESSURE & PAIN OF ARM WHILE USING IMPLANTS                                                                                                       |
| 1162                                  | 887  | Public                 | Health Centre IV  | MASAKA  | Other/NK | Pharm  |                          | Male   | 30 | 40YR OLD SEVERE HEADACHE AFTER ORAL LOSARTAN                                                                                                                                           |
| 429                                   | 425  | Private Not-for-Profit | Private Hospital  | GULU    | Other/NK | Nurse  | Enrolled Comprehensive   | Male   | 26 | 13YR/MALE ON PREDNISOLONE ORAL ROUTE GOT SEVERE EPIGASTRIC PAIN WHICH WAS MANAGED AS SEVERE STEROID-INDUCED GASTRITIS                                                                  |
|                                       | 808  | Private For-Profit     | Health Centre III | KAMPALA | Central  | Other  |                          | Male   | 24 | MALE ADULT DEVELOPED ERECTILE DYSFUNCTION DUE TO NIFEDIPINE                                                                                                                            |
| 104                                   | 983  | Public                 | National Referral | KAMPALA | Central  | Nurse  | Registered Nurse Midwife | Female | 54 | ALCOHOL 95% ADMINISTERED IN THE EYE OF A PATIENT                                                                                                                                       |
| 710                                   | 608  | Private For-Profit     | Health Centre IV  | KAMULI  | Eastern  | Nurse  | Nursing Assistant        | Female | 28 | 30 YR FEMALE REACTED TO INJECTAPLAN,OVER BLEEDING. I PRESCRIBED IBRUPROFEN & AMOXICILLIN FOR FOUR DAYS & BLEEDING STOPPED                                                              |
|                                       | 833  | Public                 | National Referral | KAMPALA | Central  | Nurse  | Registered Nurse Midwife | Female | 31 | SEVERE PALPITATIONS DUE TO OVER DOSE OF OMEPRAZOLE                                                                                                                                     |
|                                       | 1241 | Public                 | National Referral | KAMPALA | Central  | Nurse  | Registered Nurse         | Female | 45 | PATIENT RECEIVED IV METHOTREXATE, ADRIANYCIN & VINCRISTINE GOT SEVERE DIARRHOEA, ORAL STOMATITIS (NEUTROPENIC)                                                                         |
| 1050                                  | 1081 | Private Not-for-Profit | Private Hospital  | TORORO  | Eastern  | Nurse  | Enrolled Midwife         | Female | 40 | 3-MONTH-OLD BABY WAS INJECTED WITH DPT AND GOT A REDENNING OF INJECTION SITE                                                                                                           |
| 234                                   | 978  | Private For-Profit     | Other             | KAMPALA | Central  | Doctor |                          | Male   | 32 | 35YR/MALE ON IV LIGNOCAINE & ADRENALINE. GOT SWOLLEN & WAS FAILING TO BREATHE-SEVERE                                                                                                   |
| 498                                   | 1004 | Private For-Profit     | Private Hospital  | KAMPALA | Central  | Nurse  | Enrolled Nurse           | Female | 29 | LADY IN LATE TWENTIES GIVEN IV HYDROCORTISONE,GOT SEVERE BURNING SENSATION IN PRIVATE PARTS IMMEDIATELY AFTER ADMINISTRATION OF THE DRUG                                               |
| 1056                                  | 1087 | Public                 | District Hospital | TORORO  | Eastern  | Nurse  | Registered Mental Health | Female | 32 | 18YR/MALE MAN TAKING ORAL PHENORBABITONE GOT RASHES ALL OVER THE BODY SEVERE                                                                                                           |
|                                       | 13   | Public                 | National Referral | KAMPALA | Central  | Doctor |                          | Female | 25 | SJS SECONDARY TO CARBAMAZEPINE                                                                                                                                                         |
| 508                                   | 481  | Public                 | Regional Referral | LIRA    | Other/NK | Doctor |                          | Female | 35 | 22YR/FEMALE ON INJECTAPLAN CAME BACK AFTER 1 WEEK WITH CONSTANT BLEEDING. DISCONTINUED USE OF THE INJECTAPLAN                                                                          |
| 167                                   | 61   | Private For-Profit     | Private Hospital  | KAMPALA | Central  | Doctor |                          | Male   | 30 | 30YR PRIME GRAVID GIVEN MAGNESIUM SULPHATE TO PREVENT FITS-COMPLAINED OF EXCESSIVE HEAT & STARTED SWEATING WITH CHANGE IN HAEMODYNAMIC STABILITY                                       |
| 164                                   | 1878 | Public                 | National Referral | KAMPALA | Central  | Pharm  |                          | Female | 36 | SEDATION IN 12YR OLD PATIENT GIVEN ORAL CHLORPHENIRAMINE FOR ALLERGIC REACTION-MILD                                                                                                    |
| 892                                   | 1184 | Private For-Profit     | Pharmacy          | MBRA    | Other/NK | Other  |                          | Male   |    | 24YR/FEMALE DEVELOPED AN INFLAMATORY ITCHY RASH ALL-OVER AFTER TAKING ORAL PIPERAZINE,STOPPD IT AND PATIENT IMPROVED - MODERATE                                                        |
|                                       | 1606 | Public                 | National Referral | KAMPALA | Central  | Doctor |                          | Male   | 35 | VOMITING FOLLOWING THE ZINC ADMINISTRATION                                                                                                                                             |
|                                       | 1248 | Public                 | National Referral | KAMPALA | Central  | Nurse  | Registered Nurse         | Female | 25 | SEVERE MUCOSITIS IN PATIENTS WHO GOT 5-FLUOROURACIL (ANTICANCER AGENT)                                                                                                                 |
| 704                                   | 602  | Private For-Profit     | Pharmacy          | KAMULI  | Eastern  | Nurse  | Enrolled Nurse           | Male   | 32 | 24YR OLD BOY TOOK OVERDOSE OF CHLORPHENIRAMINE & FELL ASLEEP FOR A FULL DAY.                                                                                                           |



|      |      |                               |                   |         |          |        |                          |        |    |                                                                                                                            |
|------|------|-------------------------------|-------------------|---------|----------|--------|--------------------------|--------|----|----------------------------------------------------------------------------------------------------------------------------|
| 556  | 774  | Private For-Profit            | Other             | MASINDI | Other/NK | Other  | Nursing Assistant        | Male   | 24 | EXCESSIVE VAGINAL BLEEDING IN 26YR OLD PATIENT GIVEN SUBCUTANEOUS NORPLANTS                                                |
| 870  | 768  | Private For-Profit            | Health Centre IV  | JINJA   | Eastern  | Nurse  | Nursing Assistant        | Female | 28 | WOMEN REACTING TO INJECTAPLAN AND PILLPLAN WITH EXCESSIVE BLEEDING                                                         |
| 1007 | 1038 | Private Not-for-Profit        | Private Hospital  | TORORO  | Eastern  | Nurse  | Enrolled Mental Health N | Female | 20 | 27YR/MALE WITH PROTRUDING TONGUE AFTER ORAL CHLORPROMAZINE - MILD                                                          |
|      | 1246 | Public                        | National Referral | KAMPALA | Central  | Nurse  | Registered Nurse Midwife | Female | 45 | PATIENT AFTER CHEMOTHERAPHY GOT SEVERE SKIN REACTION AFTER 4WEEKS OF TREATMENT. SITE WAS LEFT HARD                         |
| 591  | 809  | Private For-Profit            | Health Centre IV  | MASINDI | Other/NK | Doctor |                          | Male   | 36 | FEMALE 25YRS WITH IMPLANT,EXCESSIVE UTERINE BLEEDING, MODERATE                                                             |
|      | 1223 | Public                        | National Referral | KAMPALA | Central  | Nurse  | Registered Nurse Midwife | Female | 45 | PATIENT WITH BURNT LEG WHEN PUT ON CHEMOTHERAPHY,HE GOT PAIN & LEG HAD WOUNDS                                              |
| 714  | 612  | Private For-Profit            | Health Centre IV  | KAMULI  | Eastern  | Nurse  | Enrolled Nurse           | Female | 22 | WOMAN CAME FEELING DIZZY AFTER TAKING FLUFED (TRIPROLIDINE, PARACETAMOL & PSEUDOEPHEDRINE),TOLD HER TO TAKE WATER & REST   |
| 58   | 911  | Public                        | National Referral | KAMPALA | Central  | Doctor |                          | Male   | 29 | 50YR/FEMALE ON ORAL LISINOPRIL FOR HYPERTENSION WITH PERSISTENT COUGH,MODERATE                                             |
| 89   | 1628 | Public                        | National Referral | KAMPALA | Central  | Doctor |                          | Female | 43 | 14YR OLD GIRL ORALLY ADMINISTERD HALOPERIDOL -GOT EXTRAPYRAMIDAL SIDE EFFECTS, MODERATE. I REDUCED DOSE AND GAVE BENZHEXOL |
|      |      | <b>No Medication Reported</b> |                   |         |          |        |                          |        |    |                                                                                                                            |
|      | 406  | Public                        | National Referral | KAMPALA | Central  | Doctor |                          | Male   | 26 | SEVERE PRURITUS                                                                                                            |
| 459  | 457  | Private For-Profit            | Health Centre III | GULU    | Other/NK | Nurse  | Registered Nurse         | Female | 24 | IT WAS MILD                                                                                                                |
| 228  | 972  | Public                        | National Referral | KAMPALA | Central  | Doctor |                          | Male   | 38 | 80YR/FEMALE WITH GENERALIZED SKIN ERUPTIONS & WOUNDS, NOT SURE OF DRUG BUT IT WAS SEVERE. ROUTE - ORAL.                    |
|      | 1203 | Public                        | National Referral | KAMPALA | Central  | Doctor |                          | Female | 26 | SULPHUR-ASSOCIATED SKIN BULLOUS ERUPTIONS (FDR KIND)                                                                       |
|      | 1213 | Public                        | National Referral | KAMPALA | Central  | Doctor |                          | Male   | 28 | NAUSEA,VOMITING                                                                                                            |
|      | 401  | Public                        | National Referral | KAMPALA | Central  | Pharm  |                          | Male   |    | DIZZINESS,LIGHT HEADEDNESS,NAUSEA                                                                                          |
|      | 830  | Public                        | National Referral | KAMPALA | Central  | Doctor |                          | Female | 39 | MUSCLE RIGIDITY AND EXCESSIVE SALIVATION                                                                                   |
| 20   | 839  | Public                        | National Referral | KAMPALA | Central  | Other  |                          | Male   | 56 | EXTRAPYRAMIDAL SIDE EFFECTS E.G. TREMORS,TARDIVE DYSKINESIA, AKATHISIA ETC                                                 |
|      | 838  | Public                        | National Referral | KAMPALA | Central  | Doctor |                          | Male   | 46 | SJS TO ART,HEPATOTOXICITY IN TB PATIENT                                                                                    |
|      | 2017 | Private For-Profit            | Health Centre III | WAKISO  | Central  | Nurse  | Registered Midwife       | Female | 40 | VERY WEAK,SORES IN THE MOUTH,SKIN RASH                                                                                     |
|      | 1222 | Public                        | National Referral | KAMPALA | Central  | Nurse  | Registered Nurse         | Male   |    | OTOTOXITY                                                                                                                  |
|      | 1243 | Public                        | National Referral | KAMPALA | Central  | Nurse  | Registered Mental Health | Female | 40 | EXTENSIVE ORAL SORES WITH SEVERE DIARRHOEA &GENERALISED BODY RASH                                                          |
|      | 844  | Public                        | National Referral | KAMPALA | Central  | Doctor |                          | Male   | 26 | SJS                                                                                                                        |
|      | 827  | Private For-Profit            | Health Centre IV  | KAMPALA | Central  | Doctor |                          | Male   | 40 | ABDOMINAL DISCOMFORT,GENERAL MALAISE                                                                                       |
| 45   | 1256 | Public                        | National Referral | KAMPALA | Central  | Nurse  | Registered Nurse         | Female | 25 | EXTRAVASATION                                                                                                              |
| 247  | 1259 | Public                        | National Referral | KAMPALA | Central  | Doctor |                          | Male   |    | 25YR WITH SEVERE ADR THAT THE SKIN & MUCOUS MEMBRANES WITH REDDENING OF EYES                                               |
| 499  | 1005 | Private For-Profit            | Private Hospital  | KAMPALA | Central  | Nurse  | Registered Nurse         | Female | 26 | 30YR,WHOLE BODY ITCHING ROUTE OF ADMINISTRATION WAS INTRAVENOUS. REACTION MODERATE                                         |
|      | 839  | Private For-Profit            | Other             | KAMPALA | Central  | Pharm  |                          | Male   | 42 | HYPERSENSITIVITY TO TREATMENT PRESENTING WITH SKIN RASHES AND BODY ITCHES                                                  |
|      | 2021 | Private For-Profit            | District Hospital | WAKISO  | Central  | Doctor |                          | Male   | 40 | VOMITING,RIGORS,SKIN RASH                                                                                                  |
|      | 1228 | Public                        | National Referral | KAMPALA | Central  | Other  | Registered Comprehensive | Female | 34 | ROLLING EYES,BODY TREMORS, SALIVA THROUGH THE MOUTH,TONGUE OUT,BODY WEAKNESS                                               |
|      | 842  | Public                        | National Referral | KAMPALA | Central  | Nurse  | Other                    | Female | 25 | SKIN RASH AND ITCHING                                                                                                      |
|      | 611  | Public                        | National Referral | KAMPALA | Central  | Nurse  | Registered Nurse Midwife | Female | 26 | RASH, STIFFNESS                                                                                                            |

|     |      |                        |                   |         |          |        |                        |        |    |                                                                                                                                                             |
|-----|------|------------------------|-------------------|---------|----------|--------|------------------------|--------|----|-------------------------------------------------------------------------------------------------------------------------------------------------------------|
| 679 | 577  | Private For-Profit     | Drug Shop         | KAMULI  | Eastern  | Nurse  | Nursing Assistant      | Female | 29 | ANAPHYLAXIS,MENTAL EFFECT,ALLERGIC REACTION,HEADACHE,ABDOMINAL DISCOMFORT                                                                                   |
|     | 405  | Public                 | National Referral | KAMPALA | Central  | Doctor |                        | Male   | 31 | PATIENT DEVELOPED WHEELS ALL OVER THE BODY                                                                                                                  |
| 437 | 433  | Private For-Profit     | Pharmacy          | GULU    | Other/NK | Nurse  | Enrolled Comprehensive | Female | 26 | MODERATE                                                                                                                                                    |
|     | 6    | Public                 | National Referral | KAMPALA | Central  | Pharm  |                        | Female | 24 | BLOOD IN URINE                                                                                                                                              |
| 174 | 68   | Private Not-for-Profit | Private Hospital  | KAMPALA | Central  | Nurse  | Enrolled Midwife       | Female | 28 | PATIENT WAS COMPLAINING OF SEVERE HEADACHE & I REFERED HIM TO A MEDICAL OFFICER                                                                             |
|     | 3    | Private Not-for-Profit | Private Hospital  | KAMPALA | Central  | Other  |                        | Male   | 30 | SKIN RASH                                                                                                                                                   |
| 933 | 1225 | Public                 | Health Centre III | MBRA    | Other/NK | Other  |                        | Male   | 47 | BODY SWELLING WITH ANEMIA                                                                                                                                   |
| 504 | 1010 | Private Not-for-Profit | Private Hospital  | WAKISO  | Central  | Other  |                        | Male   |    | GENERALISED BODY RASH WITH SORES IN 30YR OLD MALE. REACTION WAS SEVERE                                                                                      |
|     | 1632 | Private For-Profit     | Private Hospital  | KAMPALA | Central  | Doctor |                        | Male   | 27 | SJS                                                                                                                                                         |
|     | 602  | Public                 | National Referral | KAMPALA | Central  | Nurse  | Registered Nurse       | Female | 36 | SKIN PEELING WHICH COULD LEAVE SCARS                                                                                                                        |
| 622 | 520  | Public                 | District Hospital | KAMULI  | Eastern  | Nurse  | Enrolled Nurse         | Female | 39 | 1YR OLD CHILD DEVELOPED ABSCESSSES & WE USED DRAINAGE AS FORM OF TREATMENT                                                                                  |
|     | 1218 | Public                 | National Referral | KAMPALA | Central  | Nurse  | Registered Nurse       | Female | 26 | SEVERE NEUTROPENIA WITH VERY HIGH UNCONTROLLED TEMPERATURE, SEVERE MUCOSITIS, EXCESSIVE VOMITING, EXCESSIVE WEIGHT LOSS & MALNUTRITION,TUMOR LYSIS SYNDROME |
|     | 1229 | Public                 | National Referral | KAMPALA | Central  | Other  | Other                  | Male   | 32 | TREMORS OF THE HANDS & ENTIRE BODY,COMING OUT OF TONGUE,ROLLING EYES,BODY WEAKNESS                                                                          |
|     | 816  | Public                 | National Referral | KAMPALA | Central  | Doctor |                        | Male   | 26 | SJS                                                                                                                                                         |
|     | 1247 | Public                 | National Referral | KAMPALA | Central  | Nurse  | Registered Nurse       | Female | 27 | SJS, MUCOSITIS (WHERE PATIENT CANNOT PUT ANYTHING IN THE MOUTH), DROP IN BLOOD COUNTS                                                                       |
|     | 2010 | Private Not-for-Profit | Regional Referral | WAKISO  | Central  | Doctor |                        | Male   | 40 | DIARRHOREA,CONSTIPATION                                                                                                                                     |

**KEY**

ADR = ADVERSE DRUG REACTION

ART = ANTIRETROVIRAL THERAPY

AZT = ZIDOVUDINE

HAART = HIGHLY ACTIVE ANTIRETROVIRAL THERAPY

FLAGYL = METRONIDAZOLE

EFV = EFAVIRENZ

3TC = LAMIVUDINE

ISS = IMMUNOSUPPRESSED SYNDROME

IV = INTRAVENOUS

NVP = NEVIRAPINE

MEPHAQUINE = MEFLOQUINE

QNN = QUININE

SEPTRIN = COTRIMOXAZOLE

SJS = STEVENS-JOHNSON SYNDROME

TDF = TENOFOVIR

\* = CHECK APPENDIX - 2 OR MORE ADVERSE REACTIONS DESCRIBED
