# Supplementary material for: Rare, Serious, and Comprehensively Described Suspected Adverse Drug Reactions Reported by Surveyed Healthcare Professionals in Uganda
Source: PubMed Central journal article supplement (PMC4408100; doi:10.1371/journal.pone.0123974), 2015-04-23
Supplement: pone.0123974.s005.pdf [file pone.0123974.s005.pdf]

| Appendix S5: Comprehensiveness of 241 ADR descriptions from 268 healthcare professionals who suspected ADRs in the previous one month |      |                                                                                                                                           |           |      |        |          |     |       |                    |              |             |               |
|---------------------------------------------------------------------------------------------------------------------------------------|------|-------------------------------------------------------------------------------------------------------------------------------------------|-----------|------|--------|----------|-----|-------|--------------------|--------------|-------------|---------------|
| file                                                                                                                                  | id   | Description                                                                                                                               | Body Site |      |        |          |     |       | Drugclass          | Route        | Severity    | Patient's age |
|                                                                                                                                       |      |                                                                                                                                           | GI        | Skin | Swellg | Bleeding | CNS | Other |                    |              |             |               |
| 5                                                                                                                                     | 34   | VOMITING & IRRITABILITY AFTER IV QUININE ADMINISTRATION BUT LATER STABILISED. REACTIONS WERE MILD.                                        | 1         |      |        |          | 1   |       | Antimal only       | Injectable   | Mild        |               |
| 20                                                                                                                                    | 839  | EXTRAPYRAMIDAL SIDE EFFECTS E.G. TREMORS,TARDIVE DYSKINESIA, AKATHISIA ETC                                                                |           |      |        |          | 1   |       |                    |              | Unmentioned |               |
| 26                                                                                                                                    | 1810 | TINNITUS IN A 27YR-OLD AFTER IV QUININE. SEVERE (LED TO ALTERED CONSCIOUSNESS).                                                           |           |      |        |          | 1   |       | Antimal only       | Injectable   | Severe      | 27            |
| 39                                                                                                                                    | 1625 | PATIENT ON POST-EXPOSURE-PROPHYLAXIS (CBV/EFV) PRESENTS WITH EUPHORIA & DECREASED SLEEP: EFV-INDUCED NEUROPSYCHIATRIC MOOD                |           |      |        |          | 1   |       | ART only           |              | Unmentioned |               |
| 45                                                                                                                                    | 1256 | EXTRAVASATION                                                                                                                             |           |      |        |          |     | 1     |                    |              | Unmentioned |               |
| 49                                                                                                                                    | 902  | SEVERE HYPOGLYCEMIA IN ADULT-DRUG WAS ARTESUNATE/AMODIAQUINE                                                                              |           |      |        |          |     | 1     | Antimal only       |              | Severe      |               |
| 53                                                                                                                                    | 906  | REDUCED BLOOD SUGAR & LOW PULSE AFTER TAKING CHLORAMPHENICOL INJECTION                                                                    |           |      |        |          |     | 1     | Antibact only      | Injectable   | Unmentioned |               |
| 58                                                                                                                                    | 911  | 50YR/FEMALE ON ORAL LISINAPRIL FOR HYPERTENSION WITH PERSISTENT COUGH,MODERATE                                                            |           |      |        |          | 1   |       | Other              | Oral&Topical | Moderate    | 50            |
| 59                                                                                                                                    | 912  | VOMITING,IV CEFTRIAZONE-MODERATE                                                                                                          | 1         |      |        |          |     |       | Antibact only      | Injectable   | Moderate    |               |
| 61                                                                                                                                    | 914  | REACTION TO SEPTRIN PROPHYLAXIS IN A NEWLY DIAGNOSED HIV PATIENT STARTING SEPTRIN DOSE                                                    |           |      |        |          |     |       | Antibact only      |              | Unmentioned |               |
| 63                                                                                                                                    | 916  | NVP SKIN HYPERSENSITIVITY                                                                                                                 |           | 1    |        |          |     |       | ART only           |              | Unmentioned |               |
| 69                                                                                                                                    | 922  | 30YR PATIENT REACTED TO ART ADMINISTERED ORALLY. PATIENT LOST SKIN & MUCUS MEMBRANES-SEVERE                                               |           | 1    |        |          |     | 1     | ART only           | Oral&Topical | Severe      | 30            |
| 74                                                                                                                                    | 42   | 30YR HIV+ MALE REACTED MODERATELY TO ORAL SEPTRIN PROPHYLAXIS                                                                             |           |      |        |          |     |       | Antibact only      | Oral&Topical | Moderate    | 30            |
| 76                                                                                                                                    | 48   | 40YR MALE REACTED TO PENICILINS (FLUCLOXACILLIN-AMOXICILLIN COMBINATION) - GOT RASHES AFTER FIRST DOSE, REACTION WAS MODERATE             |           | 1    |        |          |     |       | Antibact only      |              | Moderate    | 40            |
| 82                                                                                                                                    | 54   | MILD SULPHUR REACTION TO ORAL TREATMENT WITH SULFADOXINE-PYRIMETHAMINE (SP) AGE-ADULT                                                     |           |      |        |          |     |       | Antimal only       | Oral&Topical | Mild        |               |
| 87                                                                                                                                    | 1626 | 1YR OLD GOT MILD REACTION TO COTRIMOXAZOLE FOR URTI                                                                                       |           |      |        |          |     |       | Antibact only      |              | Mild        | 1             |
| 89                                                                                                                                    | 1628 | 14YR OLD GIRL ORALLY ADMINISTERD HALOPERIDOL -GOT EXTRAPYRAMIDAL SIDE EFFECTS, MODERATE. I REDUCED DOSE AND GAVE BENZHEXOL                |           |      |        |          | 1   |       | Other              | Oral&Topical | Moderate    | 14            |
| 94                                                                                                                                    | 923  | 2.5YR OLD BOY REACTED TO SEPTRIN                                                                                                          |           |      |        |          |     |       | Antibact only      |              | Unmentioned | 2.5           |
| 104                                                                                                                                   | 983  | ALCOHOL 95% ADMINISTERED IN THE EYE OF A PATIENT                                                                                          |           |      |        |          |     | 1     | Other              |              | Unmentioned |               |
| 110                                                                                                                                   | 1252 | PROLONGED HEAVY FLOW,INCREASED BLOOD PRESSURE & PAIN OF ARM WHILE USING IMPLANTS                                                          |           |      |        | 1        |     | 1     | Other              |              | Unmentioned |               |
| 123                                                                                                                                   | 1839 | ORAL NEVIRAPINE INDUCED RASH-SJS IN 26YR PATIENT. [DESELECTED - REACTION TO EFVIRENZ CAUSING AUDITORY & VISUAL HALLUCINATIONS]            |           | 1    |        |          |     |       | ART only           | Oral&Topical | Unmentioned | 26            |
| 152                                                                                                                                   | 1866 | SWELLING OF FACE IN 16YR PATIENT AFTER SWALLOWING COARTEM (ORALLY)-MODERATE                                                               |           |      | 1      |          |     |       | Antimal only       | Oral&Topical | Moderate    | 16            |
| 154                                                                                                                                   | 1868 | 9YR OLD MALE GOT SKIN RASH AFTER TAKING ORAL PENICILLIN.ONSET WAS SUDDEN BUT RESOLVED AFTER USE OF TOPICAL HYDROCORTISONE CREAM           |           | 1    |        |          |     |       | Antibact only      | Oral&Topical | Unmentioned | 9             |
| 160                                                                                                                                   | 1874 | 19YR FEMALE PATIENT WITH MALARIA & COUGH REACTED SEVERELY TO COMBINATION OF QNN-IV & ORAL SEPTRIN. MANAGED WITH PARENTERAL HYDROCORTISONE |           |      |        |          |     |       | Antibact & Antimal | Injectable   | Severe      | 19            |

|     |      |                                                                                                                                                                                                                                                                                   |   |   |   |  |   |                          |              |             |    |
|-----|------|-----------------------------------------------------------------------------------------------------------------------------------------------------------------------------------------------------------------------------------------------------------------------------------|---|---|---|--|---|--------------------------|--------------|-------------|----|
| 163 | 1877 | 28YR FEMALE REACTED TO ORACURE GEL (LIGNOCAINE & CETYLPIRIDINIUM) FOR ORAL SORES-GOT SWOLLEN LIPS/TONGUE                                                                                                                                                                          |   |   | 1 |  |   | Antiseptic & Anaesthetic | Oral&Topical | Unmentioned | 28 |
| 164 | 1878 | SEDATION IN 12YR OLD PATIENT GIVEN ORAL CHLORPHENIRAMINE FOR ALLERGIC REACTION-MILD                                                                                                                                                                                               |   |   |   |  | 1 | Other                    | Oral&Topical | Mild        | 12 |
| 165 | 982  | BODY ITCHING,SWELLING &DISCOMFORT DUE TO CEPHALEXIN CAPS                                                                                                                                                                                                                          |   | 1 | 1 |  |   | 1 Antibact only          | Oral&Topical | Unmentioned |    |
| 167 | 61   | 30YR PRIME GRAVID GIVEN MAGNESIUM SULPHATE TO PREVENT FITS-COMPLAINED OF EXCESSIVE HEAT & STARTED SWEATING WITH CHANGE IN HAEMODYNAMIC STABILITY                                                                                                                                  |   | 1 |   |  | 1 | Other                    |              | Unmentioned | 30 |
| 170 | 64   | 25YR-OLD ANAEMIC, AZT                                                                                                                                                                                                                                                             |   |   |   |  |   | 1 ART only               |              | Unmentioned | 25 |
| 171 | 65   | 28YR FEMALE PATIENT GIVEN IM MORPHINE, GOT GENERALIZED SKIN ITCHING OF MODERATE SEVERITY                                                                                                                                                                                          |   | 1 |   |  |   | Analgesic only           | Injectable   | Moderate    | 28 |
| 174 | 68   | PATIENT WAS COMPLAINING OF SEVERE HEADACHE & I REFERED HIM TO A MEDICAL OFFICER                                                                                                                                                                                                   |   |   |   |  | 1 |                          |              | Severe      |    |
| 175 | 69   | IV PETHIDINE GIVEN TWICE CAUSED A SKIN REACTION                                                                                                                                                                                                                                   |   | 1 |   |  |   | Analgesic only           | Injectable   | Unmentioned |    |
| 182 | 1263 | 24 YR PATIENT, VOMITING AFTER ORAL DOXYCYCLINE, MODERATE                                                                                                                                                                                                                          | 1 |   |   |  |   | Antibact only            | Oral&Topical | Moderate    | 24 |
| 183 | 818  | 50YR FEMALE PATIENT GOT NEVIRAPINE (ORAL) HYPERSENSITIVITY INVOLVING ALL MUCUS MEMBRANES,SEVERE BUT RESOLVED                                                                                                                                                                      |   |   |   |  |   | 1 ART only               | Oral&Topical | Severe      | 50 |
| 185 | 2006 | 5YR OLD CHILD ON ORAL AMPICLOX (AMPICILLIN & CLOXACILLIN) DEVELOPED GENERALIZED RASHES. IT WAS MODERATE                                                                                                                                                                           |   | 1 |   |  |   | Antibact only            | Oral&Topical | Moderate    | 5  |
| 187 | 2008 | 28YR FEMALE ON ORAL DUOVIR-N (AZT/3TC/NVP), GOT RASH WHICH WORSENERD & SHE DEVELOPED SJS                                                                                                                                                                                          |   | 1 |   |  |   | ART only                 | Oral&Topical | Unmentioned | 28 |
| 191 | 2004 | 36YR MALE ADMITTED WITH SJS FOLLOWING INITIATION OF ORAL NEVIRAPINE,SEVERE EVENT. [DESELECTED - 17YR OLD FEMALE ON ORAL AZITHROMYCIN GOT SKIN RASHES NECESSITATING ADMISSION-MODERATE]                                                                                            |   | 1 |   |  |   | ART only                 | Oral&Topical | Severe      | 36 |
| 192 | 2005 | SKIN RASH IN A 45YR FEMALE PATIENT ON CBV/EFV/CTX FOR 2YRS TAKEN ORALLY. MODERATE. WAS REFERRED TO DERMATOLOGIST                                                                                                                                                                  |   | 1 |   |  |   | ART only                 | Oral&Topical | Moderate    | 45 |
| 194 | 984  | 37YR FEMALE PATIENT ON ORAL ARVS/TB GOT ENTIRE BODY RASH                                                                                                                                                                                                                          |   | 1 |   |  |   | ART & AntiTBs            | Oral&Topical | Unmentioned | 37 |
| 197 | 941  | 24YR/FEMALE KNOWN IMMUNOSUPPRESSED SYNDROME (ISS) PATIENT ON ANTI-TBS WHO REACTED TO COTRIMOXAZOLE - SJS & ALSO HAD TOXOPLASMOSIS                                                                                                                                                 |   | 1 |   |  |   | Antibact & AntiTBs       |              | Unmentioned | 24 |
| 205 | 949  | 26YR ANAEMIC FEMALE WITH SEVERE PRE-ECLAMPSIA FINALLY DELIVERED & WAS MANAGED POST-OPERATIVELY WITH GENTAMICIN-SUSTAINED ACUTE RENAL FAILURE WITH ANAEMIA FOR 5 DAYS & OTHER COMPLICATIONS                                                                                        |   |   |   |  |   | 1 Antibact only          |              | Unmentioned | 26 |
| 227 | 842  | 30YR/FEMALE PATIENT GIVEN IM MORPHINE & IV CEFTRIAXONE AFTER CAESARIAN-SECTION. GOT GENERALIZED BODY RASH & ITCHING 15MIN LATER                                                                                                                                                   |   | 1 |   |  |   | Antibact & Analgesic     | Injectable   | Unmentioned | 30 |
| 228 | 972  | 80YR/FEMALE WITH GENERALIZED SKIN ERUPTIONS & WOUNDS, NOT SURE OF DRUG BUT IT WAS SEVERE. ROUTE - ORAL.                                                                                                                                                                           |   | 1 |   |  |   |                          | Oral&Topical | Severe      | 80 |
| 234 | 978  | 35YR/MALE ON IV LIGNOCAINE & ADRENALINE. GOT SWOLLEN & WAS FAILING TO BREATHE-SEVERE                                                                                                                                                                                              |   |   | 1 |  | 1 | Other                    | Injectable   | Severe      | 35 |
| 243 | 1254 | 42YR/FEMALE SERO-POSITIVE, NAIVE TO HAART WITH MILD ITCHY RASH, APPETITE LOSS ,RISE IN BODY TEMPERATURE & ITCHING WHICH INTENSIFIED ON SWALLOWING SEPTIN TABLETS FIVE WEEKS AGO. PATIENT RETURNED TO FACILITY & LAB INVESTIGATIONS SHOWED DERRANGED LIVER FUNCTION TEST VARIABLES | 1 | 1 |   |  |   | 1 Antibact only          | Oral&Topical | Unmentioned | 42 |
| 247 | 1259 | 25YR WITH SEVERE ADR THAT THE SKIN & MUCOUS MEMBRANES WITH REDDENING OF EYES                                                                                                                                                                                                      |   | 1 |   |  |   | 1                        |              | Severe      | 25 |

|     |      |                                                                                                                                                                              |   |   |   |   |   |   |                      |              |             |    |
|-----|------|------------------------------------------------------------------------------------------------------------------------------------------------------------------------------|---|---|---|---|---|---|----------------------|--------------|-------------|----|
| 253 | 994  | ADULT SEVERELY REACTED TO SEPTIN AND TB DRUGS TAKEN ORALLY                                                                                                                   |   |   |   |   |   |   | Antibact & AntiTBs   | Oral&Topical | Severe      |    |
| 259 | 987  | 28YR/FEMALE GOT BODY ITCHING AFTER TAKING ORAL QUININE. ADR WAS MODERATE                                                                                                     |   | 1 |   |   |   |   | Antimal only         | Oral&Topical | Moderate    | 38 |
| 274 | 2025 | 2YR OLD, CEFTRIAXONE, INTRAVENOUS, MILD                                                                                                                                      |   |   |   |   |   |   | Antibact only        | Injectable   | Mild        | 2  |
| 278 | 2029 | ORAL DICLOFENAC 50MG, HAEMOPTYSIS AFTER 2 DAYS - WAS SEVERE. [DESELECTED - DUOCOTEXCIN - VOMITING UNNECESSARILY]                                                             |   |   |   | 1 |   |   | Analgesic only       | Oral&Topical | Severe      |    |
| 279 | 80   | LOOSE STOOL,BODY ITCHING & URTICARIA WITH BLISTERING FOLLOWING USE OF PENICILINS                                                                                             | 1 | 1 |   |   |   |   | Antibact only        |              | Unmentioned |    |
| 301 | 1650 | ELDERLY PATIENT ON PIROXICAM COMPLAINED OF HEART PAIN WHICH INDICATED PUD & ALSO GOT OEDEMA DUE TO PENICILLINS                                                               | 1 |   | 1 |   |   |   | Antibact & Analgesic |              | Unmentioned |    |
| 304 | 1653 | 28YRS, COTRIMOXAZOLE, SEVERE                                                                                                                                                 |   |   |   |   |   |   | Antibact only        |              | Severe      | 28 |
| 313 | 1662 | MILD ADR.ELDERLY MALE PATIENT GOT ITCHING AFTER BENZYL PENICILIN BY IV ROUTE                                                                                                 |   | 1 |   |   |   |   | Antibact only        | Injectable   | Mild        |    |
| 325 | 2034 | 18YR/FEMALE REACTED TO INTRAVENOUS CEFTRIAXONE BY SWELLING OF HAND THROUGH WHICH DRUG WAS GIVEN & SEVERE BACK PAIN-MILD                                                      |   |   |   | 1 |   |   | Antibact only        | Injectable   | Severe      | 18 |
| 326 | 2035 | ORAL ADMINISTRATION OF NEVIRAPINE IN PATIENT LEADING TO HEPATOTOXITY                                                                                                         |   |   |   |   |   | 1 | ART only             | Oral&Topical | Unmentioned |    |
| 327 | 843  | 35YR/FEMALE HYPERSENSITIVITY TO PENICILLINS                                                                                                                                  |   |   |   |   |   |   | Antibact only        |              | Unmentioned | 33 |
| 329 | 845  | 30YR/MALE ON ORAL TINIDAZOLE GOT HEADACHE & DIZZINESS.IT WAS MILD                                                                                                            |   |   |   |   | 1 |   | Antibact only        | Oral&Topical | Mild        | 30 |
| 331 | 847  | 24YR PATIENT REACTED TO PENICILLIN ORAL ROUTE,GOT GENERALIZED RASH AND BODY ITCHING                                                                                          |   | 1 |   |   |   |   | Antibact only        | Oral&Topical | Unmentioned | 24 |
| 332 | 1672 | ORAL ROUTE OF TRAMADOL RESULTED INTO SEVERE ITCHY SORES ALL-OVER THE BODY THAT PERSISTED                                                                                     |   | 1 |   |   |   |   | Analgesic only       | Oral&Topical | Severe      |    |
| 343 | 1687 | 26YR OLD REACTED TO SEPTIN. MODERATE REACTION                                                                                                                                |   |   |   |   |   |   | Antibact only        |              | Moderate    | 26 |
| 349 | 86   | 58YR OLD ON ORAL COTRIMOXAZOLE GOT SEVERE URTICARIA AND SKIN RASHES ALL OVER THE BODY                                                                                        |   | 1 |   |   |   |   | Antibact only        | Oral&Topical | Severe      | 58 |
| 359 | 97   | PATIENT 52YR B/S +VE FOR MALARIA PARASITES. GIVEN COARTEM FOR THREE DAYS' TREATMENT, AFTER 1 DAY GOT SKIN ITCHING & SEVERE RASH.STOPPED DRUG, GAVE IV QNN & PATIENT IMPROVED |   | 1 |   |   |   |   | Antimal only         |              | Severe      | 52 |
| 365 | 103  | 20YR/FEMALE ON PENICILIN GOT MILD REACTION                                                                                                                                   |   |   |   |   |   |   | Antibact only        |              | Mild        | 20 |
| 370 | 109  | MILD ADR.PATIENT ON ORAL EFV HAD GYNAECOMASTIA AND JERKS                                                                                                                     |   |   |   |   | 1 | 1 | ART only             | Oral&Topical | Mild        |    |
| 390 | 848  | MILD DYSPEPSIA FROM ADULTS USING ORAL ANALGESICS FOR ATHRITIS                                                                                                                | 1 |   |   |   |   |   | Analgesic only       | Oral&Topical | Mild        |    |
| 396 | 854  | REACTION TO CEFTRIAXONE WITH MILD INFLAMATION &SWELLING AT POINT OF INJECTION. [DESELECTED - REACTION TO CIPROFLOACIN WITH SWELLING OF TONGUE].                              |   |   |   | 1 |   |   | Antibact only        | Injectable   | Mild        |    |
| 398 | 856  | PATIENT PUT ON IV ARTHEMETHER,GOT GENERALIZED ITCHY SKIN RASH ABOUT 1HOUR AFTER INJECTION. WAS MILD                                                                          |   | 1 |   |   |   |   | Antimal only         | Injectable   | Mild        |    |
| 402 | 1273 | 30YR/FEMALE ON AZT/3TC/NVP GOT BODY RASH &ITCHING AFTER 2WEEKS.MODERATE ADR                                                                                                  |   | 1 |   |   |   |   | ART only             |              | Moderate    | 30 |
| 403 | 1287 | PERIPHERAL NEUROPATHY DUE TO AZT                                                                                                                                             |   |   |   |   |   | 1 | ART only             |              | Unmentioned |    |
| 409 | 1368 | 35YR/FEMALE, WITH CD4 100 CELLS/DL ON AZT/3TC/NVP,AFTER 2WEEKS SHE CAME BACK WITH A SEVERE GENERALIZED BODY RASH                                                             |   | 1 |   |   |   |   | ART only             |              | Severe      | 35 |
| 411 | 1371 | 28YR OLD ON COTRIMOXAZOLE TAB TAKEN ORALLY,MODERATE ADR (HYPERSENSITIVITY)                                                                                                   |   |   |   |   |   |   | Antibact only        | Oral&Topical | Moderate    | 28 |

|     |      |                                                                                                                                                                                                                                        |   |   |   |   |   |   |                |              |             |    |
|-----|------|----------------------------------------------------------------------------------------------------------------------------------------------------------------------------------------------------------------------------------------|---|---|---|---|---|---|----------------|--------------|-------------|----|
| 417 | 1692 | ADULT WITH UTI GIVEN ORAL CIPROFLOXIN GOT ARTHRALGIA, MODERATE ABDOMINAL PAIN,VOMITING & RESTLESSNESS. SEVERE ADR.                                                                                                                     | 1 |   |   |   | 1 | 1 | Antibact only  | Oral&Topical | Severe      |    |
| 423 | 419  | 22YR/FEMALE LADY NURSE WHO GOT NEEDLE STICK INJURY & WAS INITIATED ON PEP WITH AZT/3TC-12 DAYS LATER GOT SEVERE RASH (SJS) & WAS ADMITED AND TREATED                                                                                   |   |   |   |   |   |   | ART only       |              | Severe      | 22 |
| 429 | 425  | 13YR/MALE ON PREDNISOLONE ORAL ROUTE GOT SEVERE EPIGASTRIC PAIN WHICH WAS MANAGED AS SEVERE STEROID-INDUCED GASTRITIS                                                                                                                  | 1 |   |   |   |   |   | Other          | Oral&Topical | Severe      | 13 |
| 430 | 426  | 27YR/FEMALE ON PEP ORAL ROUTE GOT BLISTERS 3 DAYS LATER WITH BURNING SENSATION ALL-OVER THE BODY.MODERATE                                                                                                                              |   |   |   |   | 1 |   | ART only       | Oral&Topical | Moderate    | 27 |
| 437 | 433  | MODERATE                                                                                                                                                                                                                               |   |   |   |   |   |   |                |              | Moderate    |    |
| 450 | 447  | ADULT FEMALE ON ORAL COTRIMOXAZOLE GOT SWELLING AND ITCHY FACE.MILD                                                                                                                                                                    |   |   | 1 | 1 |   |   | Antibact only  | Oral&Topical | Mild        |    |
| 453 | 450  | 41YR/MALE GIVEN PANADOL (PARACETAMOL), STARTED SHAKING & SWEATING 10 MINUTES LATER.WAS PUT ON A DRIP AND HE BECAME FINE.                                                                                                               |   |   |   |   | 1 |   | Analgesic only |              | Unmentioned | 41 |
| 459 | 457  | IT WAS MILD                                                                                                                                                                                                                            |   |   |   |   |   |   |                |              | Mild        |    |
| 465 | 463  | 72YR/FEMALE REACTED TO BENZYL PENICILLIN WITH SHIVERS,ITCHY BODY RASHES & PROFUSE SWEATING IMMEDIATELY AFTER INJECTION - MODERATE                                                                                                      |   |   |   |   | 1 |   | Antibact only  | Injectable   | Moderate    | 72 |
| 466 | 464  | 32YR/FEMALE KNOWN ISS PATIENT ON COTRIMOXAZOLE CAME WITH SEVERE BODY RASHES & SLOUGHING. [DESELECTED - 18YR/MALE GIVEN IV FORTIFIED PROCAINE PENICILLIN (PPF) & SHE COLLAPSED INSTANTLY WITH DIFFICULTY IN BREATHING & BODY TREMBLING] |   |   |   |   | 1 |   | Antibact only  |              | Severe      | 32 |
| 471 | 469  | 30YR ON AZT ORAL ROUTE GOT BODY RASH,FEVER, & ITCHING- MODERATE                                                                                                                                                                        |   |   |   |   | 1 |   | ART only       | Oral&Topical | Moderate    | 30 |
| 484 | 1314 | ADULT PATIENT HAD ABDOMINAL CRAMPS & URTICARIA RASH DUE TO IV VANCOMYCIN - MODERATE                                                                                                                                                    | 1 | 1 |   |   |   |   | Antibact only  | Injectable   | Moderate    |    |
| 486 | 1289 | 4YR OLD,EFAVIRENZ-ORAL ROUTE-MODERATE ADR                                                                                                                                                                                              |   |   |   |   |   |   | ART only       | Oral&Topical | Moderate    | 4  |
| 495 | 863  | 38YR OLD FEMALE WITH SEVERE NEVIRAPINE HYPERSENSITIVITY                                                                                                                                                                                |   |   |   |   |   |   | ART only       |              | Severe      | 38 |
| 498 | 1004 | LADY IN LATE TWENTIES GIVEN IV HYDROCORTISONE,GOT SEVERE BURNING SENSATION IN PRIVATE PARTS IMMEDIATELY AFTER ADMINISTRATION OF THE DRUG                                                                                               |   |   |   |   |   |   | 1 Other        | Injectable   | Severe      | 29 |
| 499 | 1005 | 30YR,WHOLE BODY ITCHING ROUTE OF ADMINISTRATION WAS INTRAVENOUS. REACTION MODERATE                                                                                                                                                     |   |   |   |   | 1 |   |                | Injectable   | Moderate    | 30 |
| 502 | 1008 | 40YR OLD ON ETHAMBUTOL ORAL ROUTE GOT BURNING SENSATION OF BOTH LIMBS & LOSS OF SIGHT - MODERATE SEVERITY                                                                                                                              |   |   |   |   |   | 1 | 1 AntiTBs only | Oral&Topical | Moderate    | 40 |
| 504 | 1010 | GENERALISED BODY RASH WITH SORES IN 30YR OLD MALE. REACTION WAS SEVERE                                                                                                                                                                 |   |   |   |   | 1 |   |                |              | Severe      | 35 |
| 506 | 1013 | 26YR OLD ON ARVS (AZT+3TC-NVP) MODERATE ITCHY SKIN RASH-RESOLVED AFTER DISCONTINUATION OF ART. [DESELECTED -16YR OLD WITH URTICARIA DUE TO AMOXICILLIN - MILD ADR. WAS GIVEN HYDROCORTISONE].                                          |   |   |   |   | 1 |   | ART only       |              | Moderate    | 16 |
| 508 | 481  | 22YR/FEMALE ON INJECTAPLAN CAME BACK AFTER 1 WEEK WITH CONSTANT BLEEDING. DISCONTINUED USE OF THE INJECTAPLAN                                                                                                                          |   |   |   |   |   | 1 | Other          | Injectable   | Unmentioned | 22 |
| 511 | 484  | 26YR/FEMALE HAD A HISTORY OF PEPTIC ULCER DISEASE - DUE TO INDOMETHACIN BUT WAS NOT SEVERE                                                                                                                                             | 1 |   |   |   |   |   | Analgesic only |              | Moderate    | 26 |
| 518 | 491  | 10YR/MALE REACTED TO PANADOL (PARACETAMOL) WHEN TOOTH WAS REMOVED,BECAME DIZZY-MINOR                                                                                                                                                   |   |   |   |   |   | 1 | Analgesic only |              | Mild        | 10 |
| 522 | 495  | 26YR/MALE ON COARTEM ORAL ROUTE,RASH ON BOTH HANDS, ITCHING & SWELLING                                                                                                                                                                 |   |   | 1 | 1 |   |   | Antimal only   | Oral&Topical | Unmentioned | 26 |

|     |      |                                                                                                                                                                                                             |   |   |  |   |   |                |              |             |    |
|-----|------|-------------------------------------------------------------------------------------------------------------------------------------------------------------------------------------------------------------|---|---|--|---|---|----------------|--------------|-------------|----|
| 523 | 496  | 80YR OLD WOMAN REACTED TO COTRIMOXAZOLE.SKIN CHANGED BUT WAS A MILD CASE                                                                                                                                    |   | 1 |  |   |   | Antibact only  |              | Mild        | 80 |
| 550 | 2041 | 62YR/FEMALE ON COTRIMOXAZOLE ORAL ROUTE WITHIN TWO DAYS GOT MULTIPLE SKIN PATCHES, DEVELOPED SORES ON MUCOUS MEMBRANES WITH HIGH TEMPERATURE. GIVEN STEROIDS & SHE RECOVERED                                |   | 1 |  | 1 | 1 | Antibact only  | Oral&Topical | Unmentioned | 62 |
| 556 | 774  | EXCESSIVE VAGINAL BLEEDING IN 26YR OLD PATIENT GIVEN SUBCUTANEOUS NORPLANTS                                                                                                                                 |   |   |  | 1 |   | Other          | Injectable   | Unmentioned | 26 |
| 563 | 781  | 27YR OLD WITH 237 CD4 CELLS/ML ON NEVIRAPINE ORAL ROUTE GOT SEVERE RASH                                                                                                                                     |   | 1 |  |   |   | ART only       | Oral&Topical | Severe      | 27 |
| 567 | 785  | 4YR OLD ON COARTEM ORAL ROUTE. MODERATE REACTION                                                                                                                                                            |   |   |  |   |   | Antimal only   | Oral&Topical | Moderate    | 4  |
| 570 | 788  | 62YR/FEMALE ON ORAL MEPHAQUINE GOT SEVERE HEADACHE WITH MENTAL CONFUSION & INSOMNIA                                                                                                                         |   |   |  |   | 1 | Antimal only   | Oral&Topical | Severe      | 62 |
| 574 | 792  | 25YR OLD ON IV TRAMADOL 100MG, DEVELOPED PALPITATIONS & SWEATING BUT GOT BETTER AFTER 20 MINUTES - MILD                                                                                                     |   | 1 |  |   | 1 | Analgesic only | Injectable   | Mild        | 25 |
| 587 | 805  | SEPTRIN                                                                                                                                                                                                     |   |   |  |   |   | Antibact only  |              | Unmentioned |    |
| 591 | 809  | FEMALE 25YRS WITH IMPLANT,EXCESSIVE UTERINE BLEEDING, MODERATE                                                                                                                                              |   |   |  | 1 |   | Other          |              | Moderate    | 25 |
| 597 | 815  | ADULT FEMALE GOT EXTENSIVE SKIN RASH,WAS ON STARTER SEPTRIN PROPHYLAXIS                                                                                                                                     |   | 1 |  |   |   | Antibact only  |              | Unmentioned |    |
| 603 | 821  | 35YR ON AZT-CONTAINING REGIMEN ORAL ROUTE DEVELOPED SEVERE ANAEMIA LEADING TO ADMISSION & BLOOD TRANSFUSION                                                                                                 |   |   |  |   | 1 | ART only       | Oral&Topical | Severe      | 35 |
| 606 | 824  | 5YR OLD ON COTRIMOXAZOLE REACTED TO THE DRUG & WAS CHANGED TO CAP AMOXYCILLIN. MODERATE                                                                                                                     |   |   |  |   |   | Antibact only  |              | Moderate    | 5  |
| 608 | 826  | 28YR/MALE - ALLERGIC REACTION TO ORAL CIPROFLOXACIN - SEVERE URTICARIA - SUBSTITUTED FOR CEPHALEXIN & CETIRIZINE. [DESELECTED - 30YR-OLD FEMALE REACTED TO NEVIRAPINE - MODERATE & WAS SUBSTITUTED FOR EFV] |   | 1 |  |   |   | Antibact only  | Oral&Topical | Severe      | 28 |
| 612 | 830  | 45YR PATIENT ON ORAL TDF/3TC/NVP GOT SEVERE ABDOMINAL PAIN WHICH WAS IN COLICKY FORM                                                                                                                        | 1 |   |  |   |   | ART only       | Oral&Topical | Severe      | 45 |
| 613 | 831  | 39YR/FEMALE ON ZIDOVIDINE ORAL ROUTE GOT ANAEMIA. SHE WAS BLOOD TRANSFUSED & AZT WAS REPLACED WITH TENOFOVIR                                                                                                |   |   |  |   | 1 | ART only       | Oral&Topical | Unmentioned | 39 |
| 614 | 832  | 40YRS,SEPTRIN,ORALLY.SJS                                                                                                                                                                                    |   | 1 |  |   |   | Antibact only  | Oral&Topical | Unmentioned | 40 |
| 622 | 520  | 1YR OLD CHILD DEVELOPED ABSCESSSES & WE USED DRAINAGE AS FORM OF TREATMENT                                                                                                                                  |   |   |  |   | 1 |                |              | Unmentioned | 1  |
| 624 | 522  | 2YR OLD BOY WAS BROUGHT TO HOSPITAL WITH A REACTION TO QUININE & DOCTOR GAVE HIM AN ANTIDOTE BUT HE DIED                                                                                                    |   |   |  |   |   | Antimal only   |              | Unmentioned | 2  |
| 626 | 524  | 42YR OLD WOMAN REACTED TO ARVS,TREATED WITH ANTIBIOTICS, THAT IS, CEFTRIAZONE                                                                                                                               |   |   |  |   |   | ART only       |              | Unmentioned | 42 |
| 628 | 526  | 37YR OLD GOT SJS AFTER TAKING ARVS. WAS LATER GIVEN IV FLUID ANTIBIOTICS, STEROID DRUGS & SUPPORTIVE TREATMENT                                                                                              |   | 1 |  |   |   | ART only       |              | Unmentioned | 37 |
| 679 | 577  | ANAPHYLAXIS,MENTAL EFFECT,ALLERGIC REACTION,HEADACHE,ABDOMINAL DISCOMFORT                                                                                                                                   | 1 |   |  |   | 1 |                |              | Unmentioned |    |
| 682 | 580  | 55YR OLD MALE ON QUININE TABS ORAL ROUTE GOT BODY ITCHING                                                                                                                                                   |   | 1 |  |   |   | Antimal only   | Oral&Topical | Unmentioned | 55 |
| 700 | 598  | OLD WOMAN REACTED TO SEPTRIN,GENERALIZED BODY SORES,GAVE HER PREDISOLONE & PAIN KILLER PLUS BETADERM TOPICAL (BETAMETHASONE)                                                                                |   | 1 |  |   |   | Antibact only  |              | Unmentioned |    |
| 704 | 602  | 24YR OLD BOY TOOK OVERDOSE OF CHLORPHENIRAMINE & FELL ASLEEP FOR A FULL DAY.                                                                                                                                |   |   |  |   | 1 | Other          |              | Unmentioned | 24 |

|     |      |                                                                                                                                 |   |   |   |   |   |   |                |              |             |    |
|-----|------|---------------------------------------------------------------------------------------------------------------------------------|---|---|---|---|---|---|----------------|--------------|-------------|----|
| 705 | 603  | CHILDREN REACTED TO CHLOROQUINE WITH BODY ITCHING,WERE GIVEN DEXAMETHASONE TO STOP THE REACTION                                 |   | 1 |   |   |   |   | Antimal only   |              | Unmentioned |    |
| 707 | 605  | 25YR ON QUININE ORAL ROUTE, MILD, ADVISED HIM TO DRINK A LOT OF FLUIDS & TO TAKE PAIN KILLERS                                   |   |   |   |   |   |   | Antimal only   | Oral&Topical | Mild        | 25 |
| 710 | 608  | 30 YR FEMALE REACTED TO INJECTAPLAN,OVER BLEEDING. I PRESCRIBED IBRUPROFEN & AMOXICILLIN FOR FOUR DAYS & BLEEDING STOPPED       |   |   |   | 1 |   |   | Other          | Injectable   | Unmentioned | 30 |
| 714 | 612  | WOMAN CAME FEELING DIZZY AFTER TAKING FLUFED (TRIPROLIDINE, PARACETAMOL & PSEUDOEPHEDRINE),TOLD HER TO TAKE WATER & REST        |   |   |   |   | 1 |   | Other          |              | Unmentioned |    |
| 723 | 622  | 27YR/FEMALE ON ORAL DUOVIR-N (AZT/3TC/NVP) DEVELOPED SWELLING & ITCHING. WAS MODERATE                                           |   | 1 | 1 |   |   |   | ART only       | Oral&Topical | Moderate    | 27 |
| 724 | 623  | PATIENT ON SEPTRIN ORAL ROUTE,DEVELOPED RASH ALL OVER BODY, TREATMENT WAS STOPPED                                               |   | 1 |   |   |   |   | Antibact only  | Oral&Topical | Unmentioned |    |
| 725 | 624  | 16YR OLD BOY TOOK OVERDOSE OF IBRUPROFEN (20 TABLETS).PUT HIM ON A DRIP & HE RECOVERED.                                         |   |   |   |   |   |   | Analgesic only | Oral&Topical | Unmentioned | 16 |
| 738 | 637  | 26YR/MALE HIV+ ON ORAL SEPTRIN,GOT BURNT FACE & LIPS-GIVEN ORAL DEXAMETHASONE FOR FIVE DAYS - SEVERE                            |   | 1 |   |   |   |   | Antibact only  | Oral&Topical | Severe      | 26 |
| 750 | 649  | 25YR/MALE REACTED TO IV AMPICILLIN.MODERATE.WAS GIVEN HYDROCORTISONE IV                                                         |   |   |   |   |   |   | Antibact only  | Injectable   | Moderate    | 25 |
| 758 | 657  | 25YR OLD FEMALE ON CIPROFLOXACIN IV. GOT SJS.IT WAS SEVERE                                                                      |   | 1 |   |   |   |   | Antibact only  | Injectable   | Severe      | 25 |
| 771 | 670  | PATIENT REACTED TO QUININE WITH ITCHING, TREATED IT WITH CETIRIZINE                                                             |   | 1 |   |   |   |   | Antimal only   |              | Unmentioned |    |
| 783 | 682  | MAN REACTED TO FANSIDAR IV-VOMITING.TREATMENT WAS PLASIL AND WATER                                                              | 1 |   |   |   |   |   | Antimal only   | Injectable   | Unmentioned |    |
| 784 | 683  | 29YR/FEMALE REACTED TO SEPTRIN - RASHES, GAVE HER DEXAMETHASONE AND PANADOL TO TREAT THE RASHES                                 |   | 1 |   |   |   |   | Antibact only  |              | Unmentioned | 29 |
| 786 | 685  | ADR WAS DUE TO NEVIRAPINE WHILE PATIENT RECEIVED ART                                                                            |   |   |   |   |   |   | ART only       |              | Unmentioned |    |
| 791 | 690  | 21YR PATIENT REACTED TO PPF WITH VOMITING.TREATMENT CHANGED TO ERYTHOMYCIN 500MG                                                |   | 1 |   |   |   |   | Antibact only  |              | Unmentioned | 21 |
| 799 | 698  | 52YR OLD FEMALE ON COARTEM ORAL ROUTE DEVELOPED SORES ON THE WHOLE BODY                                                         |   | 1 |   |   |   |   | Antimal only   | Oral&Topical | Unmentioned | 52 |
| 809 | 708  | WOMAN ON SEPTRIN REACTED BY DEVELOPING GENERALIZED BODY RASH                                                                    |   | 1 |   |   |   |   | Antibact only  |              | Unmentioned |    |
| 851 | 749  | 28YR OLD FEMALE REACTED TO QUININE IV LEADING TO MISCARRIAGE                                                                    |   |   |   | 1 |   |   | Antimal only   | Injectable   | Unmentioned | 28 |
| 869 | 767  | 3YR OLD CHILD GIVEN IV QUININE & SHE BECAME HYPOGLYCAEMIC                                                                       |   |   |   |   |   | 1 | Antimal only   | Injectable   | Unmentioned | 3  |
| 870 | 768  | WOMEN REACTING TO INJECTAPLAN AND PILLPLAN WITH EXCESSIVE BLEEDING                                                              |   |   |   | 1 |   |   | Other          | Injectable   | Unmentioned |    |
| 876 | 1168 | COTRIMOXAZOLE ORAL, MILD ADR                                                                                                    |   |   |   |   |   |   | Antibact only  | Oral&Topical | Mild        |    |
| 878 | 1170 | 23YR MALE TOOK IBUPROFEN GOT GENERALIZED SKIN RASH & ITCHING ALL-OVER THE BODY; IT WAS MODERATE. TREATED WITH IV HYDROCORTISONE |   | 1 |   |   |   |   | Analgesic only |              | Moderate    | 23 |
| 887 | 1179 | 35YRS ORAL EFV LED TO MODERATE MENTAL DISTURBANCE, SUBSTITUTN REDUCED IT                                                        |   |   |   |   | 1 |   | ART only       | Oral&Topical | Moderate    | 35 |
| 888 | 1180 | PATIENT ON ORAL QNN GOT SKIN RASH,TINNITUS,ABORTION,VERTIGO, NAUSEA, VOMITING, BLURRED VISION - SEVERE                          | 1 | 1 |   | 1 | 1 |   | Antimal only   | Oral&Topical | Severe      |    |
| 892 | 1184 | 24YR/FEMALE DEVELOPED AN INFLAMATORY ITCHY RASH ALL-OVER AFTER TAKING ORAL PIPERAZINE,STOPPD IT AND PATIENT IMPROVED - MODERATE |   | 1 |   |   |   |   | Other          | Oral&Topical | Moderate    | 24 |
| 904 | 1196 | 29YR-OLD ON COTRIMOXAZOLE ORALLY, REACTION WAS MODERATE                                                                         |   |   |   |   |   |   | Antibact only  | Oral&Topical | Moderate    | 29 |
| 909 | 1201 | 60YR-OLD ON ORAL COTRIMOXAZOLE - RASHES,NAUSEA & SEVERE INVISIBLE SWEATS,MODERATE RXN                                           | 1 | 1 |   |   | 1 |   | Antibact only  | Oral&Topical | Moderate    | 60 |

|      |      |                                                                                                                                                                                        |   |   |   |  |  |   |                        |              |             |    |
|------|------|----------------------------------------------------------------------------------------------------------------------------------------------------------------------------------------|---|---|---|--|--|---|------------------------|--------------|-------------|----|
| 910  | 1202 | 24 YR-OLD WITH SKIN PEELING OFF DUE TO NEVIRAPINE, REACTION WAS SEVERE                                                                                                                 |   | 1 |   |  |  |   | ART only               |              | Severe      | 24 |
| 913  | 1205 | 74YR-OLD WITH CORNEAL ULCER NOT RESPONDING TO TOPICAL ANTIBIOTICS & ANTIVIRALS FOR 14 DAYS. STOPPED THE MEDICATION AND LEFT PATIENT ON ARTIFICIAL TEARS ONLY & NOTED GREAT IMPROVEMENT |   |   |   |  |  |   | 1 Antibact & Antiviral | Oral&Topical | Unmentioned | 74 |
| 914  | 1206 | 17YR-OLD ON IM QNN WITH POST INJECTION PARALYSIS, IT WAS SEVERE                                                                                                                        |   |   |   |  |  |   | 1 Antimal only         | Injectable   | Severe      | 17 |
| 919  | 1211 | 32YR OLD HIV+ MALE STARTED ON COTRIMOXAZOLE ORALLY. IT WAS SEVERE.RECOVERED                                                                                                            |   |   |   |  |  |   | Antibact only          | Oral&Topical | Severe      | 32 |
| 927  | 1219 | GASTROINTESTINAL DISTRESS DUE TO NSAID-INDUCED ULCERATION AFTER ORAL DICLOFENAC                                                                                                        | 1 |   |   |  |  |   | Analgesic only         | Oral&Topical | Unmentioned |    |
| 933  | 1225 | BODY SWELLING WITH ANEMIA                                                                                                                                                              |   |   | 1 |  |  | 1 |                        |              | Unmentioned |    |
| 949  | 134  | WOMAN AGED 30YRS ON NEVIRAPINE & COTRIMOXAZOLE WHO DEVELOPED A SKIN RASH                                                                                                               |   | 1 |   |  |  |   | Antibact & ART         |              | Unmentioned | 30 |
| 951  | 136  | 35 YR-OLD ISS PATIENT ON AZT/3TC/NVP GOT SKIN RASH MORE SEVERE ON LOWER LIMBS & SKIN STARTED PEELING OFF,DID NOT RESPOND TO STEROIDS OR ANTIFUNGALS                                    |   | 1 |   |  |  |   | ART only               |              | Severe      | 35 |
| 953  | 138  | FEMALE 39YRS IV CEFTRIAXONE - MILD                                                                                                                                                     |   |   |   |  |  |   | Antibact only          | Injectable   | Mild        | 39 |
| 957  | 142  | HIV+ PATIENT WITH BODY ACHES, SUDDEN SKIN RASH, BURNT SKIN, OOZING OF SWEAT-LIKE FLUID AFTER COTRIMOXAZOLE ADMINISTRATION - MILD SYMPTOMS                                              |   | 1 |   |  |  |   | 1 Antibact only        |              | Mild        |    |
| 986  | 1017 | 2YR OLD GIVEN IM QUININE DEVELOPED HYPOGLYCAEMIA - IMPROVED AFTER MANAGEMENT - SEVERE                                                                                                  |   |   |   |  |  |   | 1 Antimal only         | Injectable   | Severe      | 2  |
| 987  | 1019 | 38YR OLD IMMEDIATELY AFTER STARTING ORAL ARVS FELT LIKE HOT WATER HAD BEEN Poured ON HIM - SEVERE                                                                                      |   |   |   |  |  | 1 | ART only               | Oral&Topical | Severe      | 38 |
| 988  | 1020 | 8YR OLD GIRL REFERRED FROM A CLINIC AFTER RECEIVING IV QUININE & SEPTRIN DEVELOPED BLISTERS ALL-OVER THE BODY & DIED ON ADMISSION - SEVERE                                             |   | 1 |   |  |  |   | Antibact & Antimal     | Injectable   | Severe      | 8  |
| 990  | 1022 | 38YR/MALE ON SEPTRIN DEVELOPED SJS - MODERATE                                                                                                                                          |   | 1 |   |  |  |   | Antibact only          |              | Moderate    | 38 |
| 991  | 1023 | A MAN 35YRS WITH GENERALIZED SKIN RASH AFTER TAKING ORAL SEPTRIN - SEVERE                                                                                                              |   | 1 |   |  |  |   | Antibact only          | Oral&Topical | Severe      | 35 |
| 992  | 1024 | A CHILD OF 5YRS AFTER INTRAVENOUS QUININE. SHE DIED AFTER ARRIVAL                                                                                                                      |   |   |   |  |  |   | Antimal only           | Injectable   | Unmentioned | 5  |
| 996  | 1027 | 5YR OLD GIRL FROM A CLINIC WHERE SHE WAS PUT ON IV QUININE & SEPTRIN. GOT BLISTERS ALL OVER THE BODY & DIED ON ADMISSION - SEVERE                                                      |   | 1 |   |  |  |   | Antibact & Antimal     | Injectable   | Severe      | 5  |
| 1002 | 1033 | 8YR OLD BOY DEVELOPED ITCHY BODY RASH AND SWOLLEN EYES AFTER RECEIVING BENZYL PENICILLIN - MODERATE. RESOLVED WITHIN 1HR AFTER GIVING HYDROCORTISONE                                   |   | 1 | 1 |  |  |   | Antibact only          |              | Moderate    | 8  |
| 1007 | 1038 | 27YR/MALE WITH PROTRUDING TONGUE AFTER ORAL CHLORPROMAZINE - MILD                                                                                                                      |   |   |   |  |  | 1 | Other                  | Oral&Topical | Mild        | 27 |
| 1008 | 1039 | 18YR OLD GIVEN IV CEFTRIAXONE. DRUG INJECTED VERY FAST & THE PATIENT DEVELOPED SEVERE VOMITING                                                                                         | 1 |   |   |  |  |   | Antibact only          | Injectable   | Severe      | 18 |
| 1009 | 1040 | 45YR/FEMALE DEVELOPED DEEP JAUNDICE (HEPATOTOXICITY) AFTER RECEIVING ORAL NEVIRAPINE. WAS GIVEN EFV AS ALTERNATIVE DRUG AND SHE IMPROVED                                               |   |   |   |  |  |   | 1 ART only             | Oral&Topical | Unmentioned | 45 |
| 1034 | 1065 | MOTHER REPORTED CONVULSIONS WHENEVER THE CHILD TOOK HIS ORAL ARVS - MODERATE                                                                                                           |   |   |   |  |  | 1 | ART only               | Oral&Topical | Moderate    |    |
| 1038 | 1069 | 65YR/FEMALE PATIENT'S BLOOD PRESSURE LOWERED FROM 105/60 TO 86/50 MMHG & STARTED SWEATING AT A TEMPERATURE OF 35.0 DEGREES CELSIUS DUE TO DYNAPAR (IV DICLOFENAC INFUSION) - MILD      |   |   |   |  |  | 1 | 1 Analgesic only       | Injectable   | Mild        | 65 |
| 1040 | 1071 | A MAN DIAGNOSED WITH HIV TOOK COTRIMOXAZOLE AND GOT STEVENS-JOHNSON SYNDROME - SEVERE                                                                                                  |   | 1 |   |  |  |   | Antibact only          |              | Severe      |    |

|      |      |                                                                                                                                                             |   |   |  |  |   |   |   |                    |              |             |      |
|------|------|-------------------------------------------------------------------------------------------------------------------------------------------------------------|---|---|--|--|---|---|---|--------------------|--------------|-------------|------|
| 1043 | 1074 | 28YR OLD PATIENT WAS ADMINISTERED WITH COTRIMOXAZOLE TABLETS DEVELOPED BLACK PATCHES ON SKIN - MODERATE                                                     |   |   |  |  |   |   |   | Antibact only      | Oral&Topical | Moderate    | 28   |
| 1047 | 1078 | 5YR OLD GIRL WAS REFERRED FROM A CLINIC AFTER TAKING IV QUININE & SEPTIN WITH BLISTERS ALL-OVER THE BODY. SHE DIED ON ADMISSION - SEVERE                    |   |   |  |  |   |   |   | Antibact & Antimal | Injectable   | Severe      | 5    |
| 1050 | 1081 | 3-MONTH-OLD BABY WAS INJECTED WITH DPT AND GOT A REDENNING OF INJECTION SITE                                                                                |   |   |  |  |   |   |   | Other              | Injectable   | Unmentioned | 0.25 |
| 1052 | 1083 | 36YR OLD ON ORAL FANSIDAR (SULPHADOXINE/PYRIMETHAMINE) DEVELOPED HYPERPIGMENTATION OF THE SKIN & THE THROAT - MILD                                          |   |   |  |  |   |   |   | Antimal only       | Oral&Topical | Mild        | 36   |
| 1056 | 1087 | 18YR/MALE MAN TAKING ORAL PHENORBABITONE GOT RASHES ALL OVER THE BODY SEVERE                                                                                |   |   |  |  |   |   |   | Other              | Oral&Topical | Severe      | 18   |
| 1057 | 1088 | 32YR/FEMALE ISS PATIENT ON AZT/3TC/NVP FOR 3 MONTHS GOT SKIN RASH ALL OVER THE BODY - STEVEN JOHNSON SYNDROME - SEVERE                                      |   |   |  |  |   |   |   | ART only           |              | Severe      | 32   |
| 1058 | 1089 | 30YR OLD - SULPHUR REACTION-ORAL COTRIMOXAZOLE, SKIN RASH - MILD ; [Deselected - 40YR OLD NEVIRAPINE REACTION - SEVERE]                                     |   |   |  |  |   |   |   | Antibact only      | Oral&Topical | Mild        | 30   |
| 1061 | 1092 | A 20YR OLD TAKING SEPTIN ORALLY GOT SEVERE SKIN RASH ALL OVER THE BODY                                                                                      |   |   |  |  |   |   |   | Antibact only      | Oral&Topical | Severe      | 20   |
| 1067 | 1098 | 4YR HIV+ CHILD ON PROTEASE INHIBITORS SWITCHED TO ORAL EFV - SEVERE BEHAVIORAL DISTURBANCE INCLUDING AGGRESSION, INSOMNIA & HYPERACTIVITY                   |   |   |  |  | 1 |   |   | ART only           | Oral&Topical | Severe      | 4    |
| 1073 | 1104 | A FOUR-AND-A-HALF-YEAR-OLD CHILD TOOK CHLOROQUINE & DEVELOPED SKIN RASHES - MODERATE                                                                        |   |   |  |  |   |   |   | Antimal only       |              | Moderate    | 4.5  |
| 1096 | 1116 | IV/IM PENICILLINS - MODERATE RASHES AND ITCHING                                                                                                             |   |   |  |  |   |   |   | Antibact only      | Injectable   | Moderate    |      |
| 1109 | 1129 | 9-MONTH-OLD BABY ON ORAL COARTEM - VOMITING BUT RESOLVED. MILD REACTION                                                                                     | 1 |   |  |  |   |   |   | Antimal only       | Oral&Topical | Mild        | 0.75 |
| 1157 | 882  | 32YR OLD REACTED TO ORAL NEVIRAPINE - SJS. REACTION WAS MODERATE                                                                                            |   |   |  |  |   |   |   | ART only           | Oral&Topical | Moderate    | 32   |
| 1158 | 883  | ORAL NEVIRAPINE, SEVERE HEADACHE, PATIENT STABILIZED                                                                                                        |   |   |  |  | 1 |   |   | ART only           | Oral&Topical | Severe      |      |
| 1159 | 884  | ORAL NEVIRAPINE, MODERATE REACTION, DRUG WITHHELD & PATIENT STABILIZED                                                                                      |   |   |  |  |   |   |   | ART only           | Oral&Topical | Moderate    |      |
| 1161 | 886  | NVP RASHES, AZT ANEMIA, ATAZANAVIR HEPATOTOXICITY JAUNDICE                                                                                                  |   |   |  |  |   |   | 1 | ART only           |              | Unmentioned |      |
| 1162 | 887  | 40YR OLD SEVERE HEADACHE AFTER ORAL LOSARTAN                                                                                                                |   |   |  |  | 1 |   |   | Other              | Oral&Topical | Severe      | 40   |
| 1163 | 888  | 23YR OLD,FLAGYL,ITCHING & NAUSEA,MILD                                                                                                                       | 1 | 1 |  |  |   |   |   | Antibact only      |              | Mild        | 23   |
| 1165 | 890  | NVP RASH                                                                                                                                                    |   |   |  |  |   |   |   | ART only           |              | Unmentioned |      |
|      | 816  | SJS                                                                                                                                                         |   |   |  |  |   |   |   |                    |              | Unmentioned |      |
|      | 1218 | SEVERE NEUTROPENIA WITH VERY HIGH UNCONTROLLED TEMPERATURE, SEVERE MUCOSITIS, EXCESSIVE VOMITING, EXCESSIVE WEIGHT LOSS & MALNUTRITION,TUMOR LYSIS SYNDROME | 1 |   |  |  | 1 | 1 |   |                    |              | Severe      |      |
|      | 2017 | VERY WEAK,SORES IN THE MOUTH,SKIN RASH                                                                                                                      | 1 | 1 |  |  |   | 1 |   |                    |              | Unmentioned |      |
|      | 602  | SKIN PEELING WHICH COULD LEAVE SCARS                                                                                                                        |   |   |  |  |   |   |   |                    |              | Unmentioned |      |
|      | 176  | SKIN ITCHING SECONDARY TO OPIOID USE                                                                                                                        |   |   |  |  |   |   |   |                    |              | Unmentioned |      |
|      | 405  | PATIENT DEVELOPED WHEELS ALL OVER THE BODY                                                                                                                  |   |   |  |  |   |   |   |                    |              | Unmentioned |      |
|      | 401  | DIZZINESS,LIGHT HEADEDNESS,NAUSEA                                                                                                                           | 1 |   |  |  | 1 |   |   |                    |              | Unmentioned |      |
|      | 2010 | DIARRHOREA,CONSTIPATION                                                                                                                                     | 1 |   |  |  |   |   |   |                    |              | Unmentioned |      |
|      | 1632 | SJS                                                                                                                                                         |   |   |  |  |   |   |   |                    |              | Unmentioned |      |
|      | 402  | SKIN RASH DUE TO NEVIRAPINE TABLETS                                                                                                                         |   |   |  |  |   |   |   | ART only           | Oral&Topical | Unmentioned |      |
|      | 825  | PT ON ALUVIA (LOPINAVIR & RITONAVIR) COMPLAINED OF DRY MOUTH AND THROAT DISCOMFORT                                                                          | 1 |   |  |  |   |   |   | ART only           |              | Unmentioned |      |
|      | 14   | SKIN REACTIONS FOLLOWING IV CEFTRIAZONE                                                                                                                     |   |   |  |  |   |   |   | Antibact only      | Injectable   | Unmentioned |      |
