# Supplementary material for: Rare, Serious, and Comprehensively Described Suspected Adverse Drug Reactions Reported by Surveyed Healthcare Professionals in Uganda
Source: PubMed Central journal article supplement (PMC4408100; doi:10.1371/journal.pone.0123974), 2015-04-23
Supplement: pone.0123974.s006.pdf [file pone.0123974.s006.pdf]

| Appendix S6: Survey-descriptions of 106 serious suspected Adverse Drug Reactions (ADRs) of Healthcare Professionals (HCPs) who suspected ADRs in the past 4 weeks |      |                        |                   |            |          |        |                          |            |         |                                                                                                                                                                                                                                                      |
|-------------------------------------------------------------------------------------------------------------------------------------------------------------------|------|------------------------|-------------------|------------|----------|--------|--------------------------|------------|---------|------------------------------------------------------------------------------------------------------------------------------------------------------------------------------------------------------------------------------------------------------|
| file                                                                                                                                                              | id   | Level H/Facility       | Type H/Facility   | district   | Region   | Cadre  | Nurse-cadre              | HCP-Gender | HCP-Age | Serious ADR Description                                                                                                                                                                                                                              |
| <b>Antibacterials Only</b>                                                                                                                                        |      |                        |                   |            |          |        |                          |            |         |                                                                                                                                                                                                                                                      |
| 466                                                                                                                                                               | 464  | Private For-Profit     | Health Centre III | GULU       | Other/NK | Other  |                          | Male       | 26      | 32YR/FEMALE KNOWN ISS PATIENT ON COTRIMOXAZOLE CAME WITH SEVERE BODY RASHES & SLOUGHING*                                                                                                                                                             |
| 243                                                                                                                                                               | 1254 | Private Not-for-Profit | Other             | KAMPALA    | Central  | Nurse  | Registered Nurse         | Male       | 33      | 42YR/FEMALE SERO-POSITIVE, NAIVE TO HAART WITH MILD ITCHY RASH, APPETITE LOSS ,RISE IN BODY TEMPERATURE & ITCHING WHICH INTENSIFIED ON SWALLOWING SEPTRIN TABLETS FIVE WEEKS AGO. PATIENT RETURNED TO FACILITY & LAB INVESTIGATIONS SHOWED DERRANGED |
| 1043                                                                                                                                                              | 1074 | Public                 | Health Centre IV  | TORORO     | Eastern  | Nurse  | Registered Midwife       | Female     | 35      | 28YR OLD PATIENT WAS ADMINISTERED WITH COTRIMOXAZOLE TABLETS DEVELOPED BLACK PATCHES ON SKIN - MODERATE                                                                                                                                              |
| 1040                                                                                                                                                              | 1071 | Private For-Profit     | Private Hospital  | TORORO     | Eastern  | Doctor |                          | Female     | 28      | A MAN DIAGNOSED WITH HIV TOOK COTRIMOXAZOLE AND GOT STEVENS-JOHNSON SYNDROME - SEVERE                                                                                                                                                                |
| 957                                                                                                                                                               | 142  | Public                 | Health Centre III | MITOOMA    | Other/NK | Other  |                          | Male       | 27      | HIV+ PATIENT WITH BODY ACHES, SUDDEN SKIN RASH, BURNT SKIN, OOZING OF SWEAT-LIKE FLUID AFTER COTRIMOXAZOLE ADMINISTRATION - MILD SYMPTOMS                                                                                                            |
| 550                                                                                                                                                               | 2041 | Public                 | National Referral | KAMPALA    | Central  | Other  |                          | Male       | 32      | 62YR/FEMALE ON COTRIMOXAZOLE ORAL ROUTE WITHIN TWO DAYS GOT MULTIPLE SKIN PATCHES, DEVELOPED SORES ON MUCOUS MEMBRANES WITH HIGH TEMPERATURE. GIVEN STEROIDS & SHE RECOVERED                                                                         |
| 990                                                                                                                                                               | 1022 | Private Not-for-Profit | Private Hospital  | TORORO     | Eastern  | Other  |                          | Female     | 25      | 38YR/MALE ON SEPTRIN DEVELOPED SJS - MODERATE                                                                                                                                                                                                        |
| 614                                                                                                                                                               | 832  | Public                 | District Hospital | MASINDI    | Other/NK | Nurse  | Registered Nurse Midwife | Female     | 43      | 40YRS,SEPTRIN,ORALLY.SJS                                                                                                                                                                                                                             |
| 738                                                                                                                                                               | 637  | Public                 | Health Centre III | JINJA      | Eastern  | Nurse  | Enrolled Nurse           | Female     | 20      | 26YR/MALE HIV+ ON ORAL SEPTRIN,GOT BURNT FACE & LIPS-GIVEN ORAL DEXAMETHASONE FOR FIVE DAYS - SEVERE                                                                                                                                                 |
| 1008                                                                                                                                                              | 1039 | Private For-Profit     | Private Hospital  | TORORO     | Eastern  | Nurse  | Nursing Assistant        | Female     | 20      | 18YR OLD GIVEN IV CEFTRIAXONE. DRUG INJECTED VERY FAST & THE PATIENT DEVELOPED SEVERE VOMITING                                                                                                                                                       |
| 758                                                                                                                                                               | 657  | Public                 | Health Centre III | JINJA      | Eastern  | Pharm  |                          | Female     | 26      | 25YR OLD FEMALE ON CIPROFLOXACIN IV. GOT SJS.IT WAS SEVERE                                                                                                                                                                                           |
| 53                                                                                                                                                                | 906  | Private For-Profit     | Private Hospital  | KAMPALA    | Central  | Doctor |                          | Male       | 45      | REDUCED BLOOD SUGAR & LOW PULSE AFTER TAKING CHLORAMPHENICOL INJECTION                                                                                                                                                                               |
| 205                                                                                                                                                               | 949  | Public                 | Regional Referral | KAMPALA    | Central  | Doctor |                          | Male       | 28      | 26YR ANAEMIC FEMALE WITH SEVERE PRE-ECLAMPSIA FINALLY DELIVERED & WAS MANAGED POST-OPERATIVELY WITH GENTAMICIN-SUSTAINED ACUTE RENAL FAILURE WITH ANAEMIA FOR 5 DAYS & OTHER COMPLICATIONS                                                           |
| <b>Antiretrovirals Only</b>                                                                                                                                       |      |                        |                   |            |          |        |                          |            |         |                                                                                                                                                                                                                                                      |
| 183                                                                                                                                                               | 818  | Public                 | National Referral | KAMPALA    | Central  | Nurse  | Registered Nurse         | Female     | 32      | 50YR FEMALE PATIENT GOT NEVIRAPINE (ORAL) HYPERSENSITIVITY INVOLVING ALL MUCUS MEMBRANES,SEVERE BUT RESOLVED                                                                                                                                         |
| 191                                                                                                                                                               | 2004 | Public                 | National Referral | KAMPALA    | Central  | Doctor |                          | Female     | 32      | 36YR MALE ADMITTED WITH SJS FOLLOWING INITIATION OF ORAL NEVIRAPINE,SEVERE EVENT*                                                                                                                                                                    |
|                                                                                                                                                                   | 1807 | Public                 | National Referral | KAMPALA    | Central  | Doctor |                          | Male       | 29      | ISS PATIENT WITH SKIN RASH,SCALING,ULCERATIONS FOR 2WKS THAT STARTED 1WK AFTER ART INITIATION OF COMBIVIR-NEVIRAPINE (AZT/3TC/NVP)                                                                                                                   |
|                                                                                                                                                                   | 2019 | Private Not-for-Profit | Private Hospital  | WAKISO     | Central  | Doctor |                          | Male       | 27      | HIV+/FEMALE NEWLY ENROLLED ON HAART WITH NVP-BASED REGIMEN DEVELOPED SJS WHICH WAS SEVERE                                                                                                                                                            |
| 409                                                                                                                                                               | 1368 | Private For-Profit     | Private Hospital  | KIRYANDONG | Other/NK | Other  |                          | Female     | 27      | 35YR/FEMALE, WITH CD4 100 CELLS/DL ON AZT/3TC/NVP,AFTER 2WEEKS SHE CAME BACK WITH A SEVERE GENERALIZED BODY RASH                                                                                                                                     |
| 1157                                                                                                                                                              | 882  | Public                 | Health Centre III | MASAKA     | Other/NK | Other  |                          | Female     | 27      | 32YR OLD REACTED TO ORAL NEVIRAPINE - SJS. REACTION WAS MODERATE                                                                                                                                                                                     |

|      |      |                        |                   |         |          |        |                          |        |    |                                                                                                                                                      |
|------|------|------------------------|-------------------|---------|----------|--------|--------------------------|--------|----|------------------------------------------------------------------------------------------------------------------------------------------------------|
| 63   | 916  | Private Not-for-Profit | Health Centre IV  | KAMPALA | Central  | Doctor |                          | Female | 32 | NVP SKIN HYPERSENSITIVITY                                                                                                                            |
| 1057 | 1088 | Public                 | District Hospital | TORORO  | Eastern  | Nurse  | Registered Nurse         | Female | 48 | 32YR/FEMALE ISS PATIENT ON AZT/3TC/NVP FOR 3 MONTHS GOT SKIN RASH ALL OVER THE BODY - STEVEN JOHNSON SYNDROME - SEVERE                               |
| 495  | 863  | Private Not-for-Profit | Private Hospital  | KAMPALA | Central  | Doctor |                          | Male   | 24 | 38YR OLD FEMALE WITH SEVERE NEVIRAPINE HYPERSENSITIVITY                                                                                              |
| 1009 | 1040 | Private For-Profit     | Other             | TORORO  | Eastern  | Other  |                          | Male   | 32 | 45YR/FEMALE DEVELOPED DEEP JAUNDICE (HEPATOTOXICITY) AFTER RECEIVING ORAL NEVIRAPINE. WAS GIVEN EFV AS ALTERNATIVE DRUG AND SHE IMPROVED             |
| 187  | 2008 | Public                 | District Hospital | KAMPALA | Central  | Doctor |                          | Female | 33 | 28YR FEMALE ON ORAL DUOVIR-N (AZT/3TC/NVP), GOT RASH WHICH WORSENERED & SHE DEVELOPED SJS                                                            |
| 910  | 1202 | Private For-Profit     | Private Hospital  | MBRA    | Other/NK | Pharm  |                          | Male   | 27 | 24 YR-OLD WITH SKIN PEELING OFF DUE TO NEVIRAPINE, REACTION WAS SEVERE                                                                               |
| 326  | 2035 | Private For-Profit     | Private Hospital  | WAKISO  | Central  | Doctor |                          | Female |    | ORAL ADMINISTRATION OF NEVIRAPINE IN PATIENT LEADING TO HEPATOTOXITY                                                                                 |
| 563  | 781  | Public                 | District Hospital | MASINDI | Other/NK | Other  |                          | Male   | 25 | 27YR OLD WITH 237 CD4 CELLS/ML ON NEVIRAPINE ORAL ROUTE GOT SEVERE RASH                                                                              |
| 951  | 136  | Public                 | Health Centre IV  |         | Other/NK | Pharm  |                          | Female | 27 | 35 YR-OLD ISS PATIENT ON AZT/3TC/NVP GOT SKIN RASH MORE SEVERE ON LOWER LIMBS & SKIN STARTED PEELING OFF, DID NOT RESPOND TO STEROIDS OR ANTIFUNGALS |
| 123  | 1839 | Private For-Profit     | Private Hospital  | KAMPALA | Central  | Other  |                          | Male   | 27 | ORAL NEVIRAPINE INDUCED RASH-SJS IN 26YR PATIENT*                                                                                                    |
| 612  | 830  | Public                 | District Hospital | MASINDI | Other/NK | Nurse  | Registered Nurse         | Female | 33 | 45YR PATIENT ON ORAL TDF/3TC/NVP GOT SEVERE ABDOMINAL PAIN WHICH WAS IN COLICKY FORM                                                                 |
| 1161 | 886  | Public                 | Regional Referral | MASAKA  | Other/NK | Other  |                          | Female | 42 | NVP RASHES*                                                                                                                                          |
| 39   | 1625 | Public                 | National Referral | KAMPALA | Central  | Doctor |                          | Male   | 28 | PATIENT ON POST-EXPOSURE-PROPHYLAXIS (CBV/EFV) PRESENTS WITH EUPHORIA & DECREASED SLEEP: EFV-INDUCED NEUROPSYCHIATRIC MOOD                           |
| 370  | 109  | Private Not-for-Profit | District Hospital | BUIKWE  | Central  | Nurse  | Registered Nurse         | Female | 25 | MILD ADR. PATIENT ON ORAL EFV HAD GYNAECOMASTIA AND JERKS                                                                                            |
| 887  | 1179 | Private For-Profit     | Private Hospital  | MBRA    | Other/NK | Pharm  |                          | Male   | 30 | 35YRS ORAL EFV LED TO MODERATE MENTAL DISTURBANCE, SUBSTITUTN REDUCED IT                                                                             |
| 1067 | 1098 | Public                 | District Hospital | TORORO  | Eastern  | Doctor |                          | Female | 28 | 4YR HIV+ CHILD ON PROTEASE INHIBITORS SWITCHED TO ORAL EFV - SEVERE BEHAVIORAL DISTURBANCE INCLUDING AGGRESSION, INSOMNIA & HYPERACTIVITY            |
| 403  | 1287 | Public                 | Health Centre III | KAMPALA | Central  | Doctor |                          | Female | 39 | PERIPHERAL NEUROPATHY DUE TO AZT                                                                                                                     |
| 170  | 64   | Private For-Profit     | Private Hospital  | KAMPALA | Central  | Doctor |                          | Male   | 24 | 25YR-OLD ANAEMIC, AZT                                                                                                                                |
| 613  | 831  | Public                 | District Hospital | MASINDI | Other/NK | Other  |                          | Female | 36 | 39YR/FEMALE ON ZIDOVIDINE ORAL ROUTE GOT ANAEMIA. SHE WAS BLOOD TRANSFUSED & AZT WAS REPLACED WITH TENOFOVIR                                         |
| 603  | 821  | Public                 | District Hospital | MASINDI | Other/NK | Other  |                          | Male   | 38 | 35YR ON AZT-CONTAINING REGIMEN ORAL ROUTE DEVELOPED SEVERE ANAEMIA LEADING TO ADMISSION & BLOOD TRANSFUSION                                          |
| 423  | 419  | Private Not-for-Profit | Regional Referral | GULU    | Other/NK | Pharm  |                          | Female | 26 | 22YR/FEMALE LADY NURSE WHO GOT NEEDLE STICK INJURY & WAS INITIATED ON PEP WITH AZT/3TC-12 DAYS LATER GOT SEVERE RASH (SJS) & WAS ADMITED AND TREATED |
| 628  | 526  | Public                 | District Hospital | KAMULI  | Eastern  | Other  |                          | Male   | 30 | 37YR OLD GOT SJS AFTER TAKING ARVS. WAS LATER GIVEN IV FLUID ANTIBIOTICS, STEROID DRUGS & SUPPORTIVE TREATMENT                                       |
| 69   | 922  | Public                 | National Referral | KAMPALA | Central  | Nurse  | Registered Nurse Midwife | Female |    | 30YR PATIENT REACTED TO ART ADMINISTERED ORALLY. PATIENT LOST SKIN & MUCUS MEMBRANES-SEVERE                                                          |
| 430  | 426  | Private Not-for-Profit | Private Hospital  | GULU    | Other/NK | Nurse  | Registered Nurse         | Female | 36 | 27YR/FEMALE ON PEP ORAL ROUTE GOT BLISTERS 3 DAYS LATER WITH BURNING SENSATION ALL-OVER THE BODY.MODERATE                                            |
| 1034 | 1065 | Private Not-for-Profit | District Hospital | TORORO  | Eastern  | Nurse  | Registered Nurse         | Male   | 25 | MOTHER REPORTED CONVULSIONS WHENEVER THE CHILD TOOK HIS ORAL ARVS - MODERATE                                                                         |

| Antimalarials Only                      |      |                        |                   |         |          |        |                          |        |    |                                                                                                                                                                              |
|-----------------------------------------|------|------------------------|-------------------|---------|----------|--------|--------------------------|--------|----|------------------------------------------------------------------------------------------------------------------------------------------------------------------------------|
| 992                                     | 1024 | Private Not-for-Profit | Private Hospital  | TORORO  | Eastern  | Nurse  | Enrolled Nurse           | Female | 27 | A CHILD OF 5YRS AFTER INTRAVENOUS QUININE. SHE DIED AFTER ARRIVAL#                                                                                                           |
| 869                                     | 767  | Public                 | Regional Referral | JINJA   | Eastern  | Nurse  | Registered Nurse         | Female | 32 | 3YR OLD CHILD GIVEN IV QUININE & SHE BECAME HYPOGLYCAEMIC                                                                                                                    |
| 986                                     | 1017 | Private Not-for-Profit | Private Hospital  | TORORO  | Eastern  | Nurse  | Enrolled Comprehensive N | Male   | 24 | 2YR OLD GIVEN IM QUININE DEVELOPED HYPOGLYCAEMIA - IMPROVED AFTER MANAGEMENT - SEVERE                                                                                        |
| 624                                     | 522  | Public                 | District Hospital | KAMULI  | Eastern  | Nurse  | Enrolled Nurse           | Male   | 47 | 2YR OLD BOY WAS BROUGHT TO HOSPITAL WITH A REACTION TO QUININE & DOCTOR GAVE HIM AN ANTIDOTE BUT HE DIED                                                                     |
| 914                                     | 1206 | Private Not-for-Profit | Private Hospital  | MBRA    | Other/NK | Nurse  | Enrolled Nurse           | Female | 60 | 17YR-OLD ON IM QNN WITH POST INJECTION PARALYSIS, IT WAS SEVERE                                                                                                              |
| 26                                      | 1810 | Private For-Profit     | Health Centre III | KAMPALA | Central  | Doctor |                          | Male   | 35 | TINNITUS IN A 27YR-OLD AFTER IV QUININE. SEVERE (LED TO ALTERED CONSCIOUSNESS).                                                                                              |
| 888                                     | 1180 | Private Not-for-Profit | Private Hospital  | MBRA    | Other/NK | Nurse  | Enrolled Nurse           | Female | 50 | PATIENT ON ORAL QNN GOT SKIN RASH,TINNITUS,ABORTION,VERTIGO, NAUSEA, VOMITING, BLURRED VISION - SEVERE                                                                       |
| 851                                     | 749  | Private For-Profit     | Drug Shop         | JINJA   | Eastern  | Nurse  | Registered Midwife       | Male   | 30 | 28YR OLD FEMALE REACTED TO QUININE IV LEADING TO MISCARRIAGE                                                                                                                 |
| 799                                     | 698  | Private Not-for-Profit | Health Centre IV  | JINJA   | Eastern  | Doctor |                          | Male   | 24 | 52YR OLD FEMALE ON COARTEM ORAL ROUTE DEVELOPED SORES ON THE WHOLE BODY                                                                                                      |
| 359                                     | 97   | Private Not-for-Profit | Other             | BUIKWE  | Central  | Doctor |                          | Male   | 52 | PATIENT 52YR B/S +VE FOR MALARIA PARASITES. GIVEN COARTEM FOR THREE DAYS' TREATMENT, AFTER 1 DAY GOT SKIN ITCHING & SEVERE RASH.STOPPED DRUG, GAVE IV QNN & PATIENT IMPROVED |
| 49                                      | 902  | Public                 | Health Centre IV  | KAMPALA | Central  | Doctor |                          | Male   |    | SEVERE HYPOGLYCEMIA IN ADULT-DRUG WAS ARTESUNATE/AMODIAQUINE                                                                                                                 |
| 570                                     | 788  | Private For-Profit     | Health Centre IV  | MASINDI | Other/NK | Doctor |                          | Male   | 62 | 62YR/FEMALE ON ORAL MEPHAQUINE GOT SEVERE HEADACHE WITH MENTAL CONFUSION & INSOMNIA                                                                                          |
| Antibacterials & Antimalarials          |      |                        |                   |         |          |        |                          |        |    |                                                                                                                                                                              |
| 160                                     | 1874 | Private For-Profit     | Health Centre IV  | KAMPALA | Central  | Doctor |                          | Female |    | 19YR FEMALE PATIENT WITH MALARIA & COUGH REACTED SEVERELY TO COMBINATION OF QNN-IV & ORAL SEPTRIN. MANAGED WITH PARENTERAL HYDROCORTISONE                                    |
| 996                                     | 1027 | Private Not-for-Profit | Private Hospital  | TORORO  | Eastern  | Nurse  | Enrolled Comprehensive N | Female | 30 | 5YR OLD GIRL FROM A CLINIC WHERE SHE WAS PUT ON IV QUININE & SEPTRIN. GOT BLISTERS ALL OVER THE BODY & DIED ON ADMISSION - SEVERE                                            |
| 988                                     | 1020 | Private Not-for-Profit | Private Hospital  | TORORO  | Eastern  | Nurse  | Enrolled Comprehensive N | Female | 27 | 8YR OLD GIRL REFERRED FROM A CLINIC AFTER RECEIVING IV QUININE & SEPTRIN DEVELOPED BLISTERS ALL-OVER THE BODY & DIED ON ADMISSION - SEVERE                                   |
| 1047                                    | 1078 | Private Not-for-Profit | Private Hospital  | TORORO  | Eastern  | Nurse  | Nursing Assistant        | Female | 29 | 5YR OLD GIRL WAS REFERRED FROM A CLINIC AFTER TAKING IV QUININE & SEPTRIN WITH BLISTERS ALL-OVER THE BODY. SHE DIED ON ADMISSION - SEVERE                                    |
| Antituberculosis drugs Only             |      |                        |                   |         |          |        |                          |        |    |                                                                                                                                                                              |
| 502                                     | 1008 | Private Not-for-Profit | Private Hospital  | KAMPALA | Central  | Nurse  | Enrolled Comprehensive N | Male   | 30 | 40YR OLD ON ETHAMBUTOL ORAL ROUTE GOT BURNING SENSATION OF BOTH LIMBS & LOSS OF SIGHT - MODERATE SEVERITY                                                                    |
| Antibacterials & Antituberculosis drugs |      |                        |                   |         |          |        |                          |        |    |                                                                                                                                                                              |
| 197                                     | 941  | Private Not-for-Profit | Private Hospital  | KAMPALA | Central  | Doctor |                          | Male   | 26 | 24YR/FEMALE KNOWN IMMUNOSUPPRESSED SYNDROME (ISS) PATIENT ON ANTI-TBS WHO REACTED TO COTRIMOXAZOLE - SJS & ALSO HAD TOXOPLASMOSIS                                            |
| Analgesics Only                         |      |                        |                   |         |          |        |                          |        |    |                                                                                                                                                                              |
| 278                                     | 2029 | Private For-Profit     | Private Hospital  | KAMPALA | Central  | Doctor |                          | Male   | 28 | ORAL DICLOFENAC 50MG, HAEMOPTYSIS AFTER 2 DAYS - WAS SEVERE*                                                                                                                 |
| 927                                     | 1219 | Private For-Profit     | Pharmacy          | MBRA    | Other/NK | Pharm  |                          | Male   | 25 | GASTROINTESTINAL DISTRESS DUE TO NSAID-INDUCED ULCERATION AFTER ORAL DICLOFENAC                                                                                              |

|                                        |      |                        |                   |         |          |        |                          |        |    |                                                                                                                                                                                        |
|----------------------------------------|------|------------------------|-------------------|---------|----------|--------|--------------------------|--------|----|----------------------------------------------------------------------------------------------------------------------------------------------------------------------------------------|
|                                        | 16   | Public                 | National Referral | KAMPALA | Central  | Pharm  |                          | Male   | 25 | PATIENT DEVELOPED PEPTIC ULCER DISEASE A FEW DAYS AFTER TAKING ACECLOFENAC                                                                                                             |
| 511                                    | 484  | Public                 | Regional Referral | LIRA    | Other/NK | Pharm  |                          | Male   | 38 | 26YR/FEMALE HAD A HISTORY OF PEPTIC ULCER DISEASE - DUE TO INDOMETHACIN BUT WAS NOT SEVERE                                                                                             |
| 453                                    | 450  | Public                 | National Referral | GULU    | Other/NK | Doctor |                          | Female | 35 | 41YR/MALE GIVEN PANADOL (PARACETAMOL), STARTED SHAKING & SWEATING 10 MINUTES LATER.WAS PUT ON A DRIP AND HE BECAME FINE.                                                               |
| <b>Antibacterials &amp; Analgesics</b> |      |                        |                   |         |          |        |                          |        |    |                                                                                                                                                                                        |
| 301                                    | 1650 | Private For-Profit     | Health Centre III | KAYUNGA | Central  | Nurse  | Enrolled Nurse           | Female |    | ELDERLY PATIENT ON PIROXICAM COMPLAINED OF HEART PAIN WHICH INDICATED PUD & ALSO GOT OEDEMA DUE TO PENICILLINS                                                                         |
| <b>Antibacterials &amp; Antivirals</b> |      |                        |                   |         |          |        |                          |        |    |                                                                                                                                                                                        |
| 913                                    | 1205 | Private Not-for-Profit | Private Hospital  | MBRA    | Other/NK | Doctor |                          | Male   | 41 | 74YR-OLD WITH CORNEAL ULCER NOT RESPONDING TO TOPICAL ANTIBIOTICS & ANTIVIRALS FOR 14 DAYS. STOPPED THE MEDICATION AND LEFT PATIENT ON ARTIFICIAL TEARS ONLY & NOTED GREAT IMPROVEMENT |
| <b>Other Medications</b>               |      |                        |                   |         |          |        |                          |        |    |                                                                                                                                                                                        |
| 110                                    | 1252 | Public                 | National Referral | KAMPALA | Central  | Nurse  | Enrolled Midwife         | Female | 51 | PROLONGED HEAVY FLOW,INCREASED BLOOD PRESSURE & PAIN OF ARM WHILE USING IMPLANTS                                                                                                       |
| 710                                    | 608  | Private For-Profit     | Health Centre IV  | KAMULI  | Eastern  | Nurse  | Nursing Assistant        | Female | 28 | 30 YR FEMALE REACTED TO INJECTAPLAN,OVER BLEEDING. I PRESCRIBED IBRUPROFEN & AMOXICILLIN FOR FOUR DAYS & BLEEDING STOPPED                                                              |
| 508                                    | 481  | Public                 | Regional Referral | LIRA    | Other/NK | Doctor |                          | Female | 35 | 22YR/FEMALE ON INJECTAPLAN CAME BACK AFTER 1 WEEK WITH CONSTANT BLEEDING. DISCONTINUED USE OF THE INJECTAPLAN                                                                          |
| 556                                    | 774  | Private For-Profit     | Other             | MASINDI | Other/NK | Other  | Nursing Assistant        | Male   | 24 | EXCESSIVE VAGINAL BLEEDING IN 26YR OLD PATIENT GIVEN SUBCUTANEOUS NORPLANTS                                                                                                            |
| 870                                    | 768  | Private For-Profit     | Health Centre IV  | JINJA   | Eastern  | Nurse  | Nursing Assistant        | Female | 28 | WOMEN REACTING TO INJECTAPLAN AND PILLPLAN WITH EXCESSIVE BLEEDING                                                                                                                     |
| 591                                    | 809  | Private For-Profit     | Health Centre IV  | MASINDI | Other/NK | Doctor |                          | Male   | 36 | FEMALE 25YRS WITH IMPLANT,EXCESSIVE UTERINE BLEEDING, MODERATE                                                                                                                         |
|                                        | 1241 | Public                 | National Referral | KAMPALA | Central  | Nurse  | Registered Nurse         | Female | 45 | DIARRHOEA, ORAL STOMATITIS (NEUTROPENIC)                                                                                                                                               |
|                                        | 1248 | Public                 | National Referral | KAMPALA | Central  | Nurse  | Registered Nurse         | Female | 25 | SEVERE MUCOSITIS IN PATIENTS WHO GOT 5-FLUOROURACIL (ANTICANCER AGENT)                                                                                                                 |
|                                        | 1246 | Public                 | National Referral | KAMPALA | Central  | Nurse  | Registered Nurse Midwife | Female | 45 | PATIENT AFTER CHEMOTHERAPHY GOT SEVERE SKIN REACTION AFTER 4WEEKS OF TREATMENT. SITE WAS LEFT HARD                                                                                     |
|                                        | 1223 | Public                 | National Referral | KAMPALA | Central  | Nurse  | Registered Nurse Midwife | Female | 45 | PATIENT WITH BURNT LEG WHEN PUT ON CHEMOTHERAPHY,HE GOT PAIN & LEG HAD WOUNDS                                                                                                          |
| 429                                    | 425  | Private Not-for-Profit | Private Hospital  | GULU    | Other/NK | Nurse  | Enrolled Comprehensive N | Male   | 26 | 13YR/MALE ON PREDNISOLONE ORAL ROUTE GOT SEVERE EPIGASTRIC PAIN WHICH WAS MANAGED AS SEVERE STEROID-INDUCED GASTRITIS                                                                  |
| 104                                    | 983  | Public                 | National Referral | KAMPALA | Central  | Nurse  | Registered Nurse Midwife | Female | 54 | ALCOHOL 95% ADMINISTERED IN THE EYE OF A PATIENT                                                                                                                                       |
|                                        | 833  | Public                 | National Referral | KAMPALA | Central  | Nurse  | Registered Nurse Midwife | Female | 31 | SEVERE PALPITATIONS DUE TO OVER DOSE OF OMEPRAZOLE                                                                                                                                     |
| 234                                    | 978  | Private For-Profit     | Other             | KAMPALA | Central  | Doctor |                          | Male   | 32 | 35YR/MALE ON IV LIGNOCAINE & ADRENALINE. GOT SWOLLEN & WAS FAILING TO BREATHE-SEVERE                                                                                                   |
|                                        | 13   | Public                 | National Referral | KAMPALA | Central  | Doctor |                          | Female | 25 | SJS SECONDARY TO CARBAMAZEPINE                                                                                                                                                         |
| 167                                    | 61   | Private For-Profit     | Private Hospital  | KAMPALA | Central  | Doctor |                          | Male   | 30 | 30YR PRIME GRAVID GIVEN MAGNESIUM SULPHATE TO PREVENT FITS-COMPLAINED OF EXCESSIVE HEAT & STARTED SWEATING WITH CHANGE IN HAEMODYNAMIC STABILITY                                       |
| 704                                    | 602  | Private For-Profit     | Pharmacy          | KAMULI  | Eastern  | Nurse  | Enrolled Nurse           | Male   | 32 | 24YR OLD BOY TOOK OVERDOSE OF CHLORPHENIRAMINE & FELL ASLEEP FOR A FULL DAY.                                                                                                           |

|                               |      |                        |                   |         |          |        |                           |        |    |                                                                                                                                                             |
|-------------------------------|------|------------------------|-------------------|---------|----------|--------|---------------------------|--------|----|-------------------------------------------------------------------------------------------------------------------------------------------------------------|
| 1007                          | 1038 | Private Not-for-Profit | Private Hospital  | TORORO  | Eastern  | Nurse  | Enrolled Mental Health Nu | Female | 20 | 27YR/MALE WITH PROTRUDING TONGUE AFTER ORAL CHLORPROMAZINE - MILD                                                                                           |
| 89                            | 1628 | Public                 | National Referral | KAMPALA | Central  | Doctor |                           | Female | 43 | 14YR OLD GIRL ORALLY ADMINISTERD HALOPERIDOL -GOT EXTRAPYRAMIDAL SIDE EFFECTS, MODERATE. I REDUCED DOSE AND GAVE BENZHEXOL                                  |
| <b>No Medication Reported</b> |      |                        |                   |         |          |        |                           |        |    |                                                                                                                                                             |
|                               | 1247 | Public                 | National Referral | KAMPALA | Central  | Nurse  | Registered Nurse          | Female | 27 | SJS, MUCOSITIS (WHERE PATIENT CANNOT PUT ANYTHING IN THE MOUTH), DROP IN BLOOD COUNTS                                                                       |
|                               | 844  | Public                 | National Referral | KAMPALA | Central  | Doctor |                           | Male   | 26 | SJS                                                                                                                                                         |
|                               | 1632 | Private For-Profit     | Private Hospital  | KAMPALA | Central  | Doctor |                           | Male   | 27 | SJS                                                                                                                                                         |
|                               | 816  | Public                 | National Referral | KAMPALA | Central  | Doctor |                           | Male   | 26 | SJS                                                                                                                                                         |
|                               | 830  | Public                 | National Referral | KAMPALA | Central  | Doctor |                           | Female | 39 | MUSCLE RIGIDITY AND EXCESSIVE SALIVATION                                                                                                                    |
| 20                            | 839  | Public                 | National Referral | KAMPALA | Central  | Other  |                           | Male   | 56 | EXTRAPYRAMIDAL SIDE EFFECTS E.G. TREMORS,TARDIVE DYSKINESIA, AKATHISIA ETC                                                                                  |
|                               | 1228 | Public                 | National Referral | KAMPALA | Central  | Other  | Registered Comprehensive  | Female | 34 | ROLLING EYES,BODY TREMORS, SALIVA THROUGH THE MOUTH,TONGUE OUT,BODY WEAKNESS                                                                                |
|                               | 1229 | Public                 | National Referral | KAMPALA | Central  | Other  | Other                     | Male   | 32 | TREMORS OF THE HANDS & ENTIRE BODY,COMING OUT OF TONGUE,ROLLING EYES,BODY WEAKNESS                                                                          |
|                               | 1203 | Public                 | National Referral | KAMPALA | Central  | Doctor |                           | Female | 26 | SULPHUR-ASSOCIATED SKIN BULLOUS ERUPTIONS (FDR KIND)                                                                                                        |
|                               | 838  | Public                 | National Referral | KAMPALA | Central  | Doctor |                           | Male   | 46 | HEPATOTOXICITY IN TB PATIENT*                                                                                                                               |
|                               | 1222 | Public                 | National Referral | KAMPALA | Central  | Nurse  | Registered Nurse          | Male   |    | OTOTOXITY                                                                                                                                                   |
|                               | 1243 | Public                 | National Referral | KAMPALA | Central  | Nurse  | Registered Mental Health  | Female | 40 | EXTENSIVE ORAL SORES WITH SEVERE DIARRHOEA &GENERALISED BODY RASH                                                                                           |
| 247                           | 1259 | Public                 | National Referral | KAMPALA | Central  | Doctor |                           | Male   |    | 25YR WITH SEVERE ADR THAT THE SKIN & MUCOUS MEMBRANES WITH REDDENING OF EYES                                                                                |
| 679                           | 577  | Private For-Profit     | Drug Shop         | KAMULI  | Eastern  | Nurse  | Nursing Assistant         | Female | 29 | ANAPHYLAXIS,MENTAL EFFECT,ALLERGIC REACTION,HEADACHE,ABDOMINAL DISCOMFORT                                                                                   |
|                               | 6    | Public                 | National Referral | KAMPALA | Central  | Pharm  |                           | Female | 24 | BLOOD IN URINE                                                                                                                                              |
| 933                           | 1225 | Public                 | Health Centre III | MBRA    | Other/NK | Other  |                           | Male   | 47 | BODY SWELLING WITH ANEMIA                                                                                                                                   |
|                               | 602  | Public                 | National Referral | KAMPALA | Central  | Nurse  | Registered Nurse          | Female | 36 | SKIN PEELING WHICH COULD LEAVE SCARS                                                                                                                        |
|                               | 1218 | Public                 | National Referral | KAMPALA | Central  | Nurse  | Registered Nurse          | Female | 26 | SEVERE NEUTROPENIA WITH VERY HIGH UNCONTROLLED TEMPERATURE, SEVERE MUCOSITIS, EXCESSIVE VOMITING, EXCESSIVE WEIGHT LOSS & MALNUTRITION,TUMOR LYSIS SYNDROME |

**KEY**

ADR = ADVERSE DRUG REACTION  
ART = ANTIRETROVIRAL THERAPY  
AZT = ZIDOVUDINE  
HAART = HIGHLY ACTIVE ANTIRETROVIRAL THERAPY  
FLAGYL = METRONIDAZOLE  
EFV = EFAVIRENZ  
3TC = LAMIVUDINE  
ISS = IMMUNOSUPRESSED SYNDROME

IV = INTRAVENOUS  
NVP = NEVIRAPINE  
MEPHAQUINE = MEFLOQUINE  
QNN = QUININE  
SEPTRIN = COTRIMOXAZOLE  
SJS = STEVENS-JOHNSON SYNDROME  
TDF = TENOFOVIR  
\* = CHECK APPENDIX - 2 OR MORE ADVERSE REACTIONS DESCRIBED

# = MAY BE THE SAME CHILD AS IN THE 3 FATAL DESCRIPTIONS INVOLVING QUININE & SEPTRIN EXCEPT THAT SEPTRIN WAS NOT MENTIONED
