# Supplementary material for: Rare, Serious, and Comprehensively Described Suspected Adverse Drug Reactions Reported by Surveyed Healthcare Professionals in Uganda
Source: PubMed Central journal article supplement (PMC4408100; doi:10.1371/journal.pone.0123974), 2015-04-23
Supplement: pone.0123974.s007.pdf [file pone.0123974.s007.pdf]

**Appendix S7: Survey-descriptions of 59 severe suspected Adverse Drug Reactions (ADRs) by Healthcare Professionals (HCPs) who suspected ADRs in the past 4 weeks**

| file                        | id   | Level H/Facility       | Type H/Facility   | District  | Region   | Cadre  | Nurse-cadre              | HCP-Gender | HCP-Age | Severe ADR Description                                                                                                  |
|-----------------------------|------|------------------------|-------------------|-----------|----------|--------|--------------------------|------------|---------|-------------------------------------------------------------------------------------------------------------------------|
| <b>Antibacterials Only</b>  |      |                        |                   |           |          |        |                          |            |         |                                                                                                                         |
| 304                         | 1653 | Public                 | District Hospital | KAYUNGA   | Central  | Nurse  | Registered Midwife       | Female     | 42      | 28YRS, COTRIMOXAZOLE, SEVERE                                                                                            |
| 466                         | 464  | Private For-Profit     | Health Centre III | GULU      | Other/NK | Other  |                          | Male       | 26      | 32YR/FEMALE KNOWN ISS PATIENT ON COTRIMOXAZOLE CAME WITH SEVERE BODY RASHES & SLOUGHING*                                |
| 1040                        | 1071 | Private For-Profit     | Private Hospital  | TORORO    | Eastern  | Doctor |                          | Female     | 28      | A MAN DIAGNOSED WITH HIV TOOK COTRIMOXAZOLE AND GOT STEVENS-JOHNSON SYNDROME - SEVERE                                   |
| 919                         | 1211 | Private For-Profit     | Health Centre III | MBRA      | Other/NK | Doctor |                          | Male       | 47      | 32YR OLD HIV+ MALE STARTED ON COTRIMOXAZOLE ORALLY. IT WAS SEVERE.RECOVERED                                             |
| 738                         | 637  | Public                 | Health Centre III | JINJA     | Eastern  | Nurse  | Enrolled Nurse           | Female     | 20      | 26YR/MALE HIV+ ON ORAL SEPTRIN,GOT BURNT FACE & LIPS-GIVEN ORAL DEXAMETHASONE FOR FIVE DAYS - SEVERE                    |
| 991                         | 1023 | Private Not-for-Profit | Private Hospital  | TORORO    | Eastern  | Nurse  | Enrolled Comprehensive   | Male       | 20      | A MAN 35YRS WITH GENERALIZED SKIN RASH AFTER TAKING ORAL SEPTRIN - SEVERE                                               |
| 1061                        | 1092 | Public                 | District Hospital | TORORO    | Eastern  | Nurse  | Nursing Assistant        | Female     | 50      | A 20YR OLD TAKING SEPTRIN ORALLY GOT SEVERE SKIN RASH ALL OVER THE BODY                                                 |
| 349                         | 86   | Private For-Profit     | Health Centre IV  | BUIKWE    | Central  | Nurse  | Enrolled Comprehensive   | Male       | 25      | 58YR OLD ON ORAL COTRIMOXAZOLE GOT SEVERE URTICARIA AND SKIN RASHES ALL OVER THE BODY                                   |
| 417                         | 1692 | Private For-Profit     | Health Centre IV  | KAMPALA   | Central  | Nurse  | Enrolled Nurse           | Male       | 25      | ADULT WITH UTI GIVEN ORAL CIPROFLOXIN GOT ARTHRALGIA, MODERATE ABDOMINAL PAIN,VOMITING & RESTLESSNESS. SEVERE ADR.      |
| 758                         | 657  | Public                 | Health Centre III | JINJA     | Eastern  | Pharm  |                          | Female     | 26      | 25YR OLD FEMALE ON CIPROFLOXACIN IV. GOT SJS.IT WAS SEVERE                                                              |
| 608                         | 826  | Public                 | District Hospital | MASINDI   | Other/NK | Other  |                          | Male       |         | 28YR/MALE - ALLERGIC REACTION TO ORAL CIPROFLOXACIN - SEVERE URTICARIA - SUBSTITUTED FOR CEPHALEXIN & CETIRIZINE*       |
| 325                         | 2034 | Private For-Profit     | Private Hospital  | WAKISO    | Central  | Nurse  | Enrolled Comprehensive   | Female     |         | 18YR/FEMALE REACTED TO INTRAVENOUS CEFTRIAXONE BY SWELLING OF HAND THROUGH WHICH DRUG WAS GIVEN & SEVERE BACK PAIN-MILD |
| 1008                        | 1039 | Private For-Profit     | Private Hospital  | TORORO    | Eastern  | Nurse  | Nursing Assistant        | Female     | 20      | 18YR OLD GIVEN IV CEFTRIAXONE. DRUG INJECTED VERY FAST & THE PATIENT DEVELOPED SEVERE VOMITING                          |
| <b>Antiretrovirals Only</b> |      |                        |                   |           |          |        |                          |            |         |                                                                                                                         |
| 183                         | 818  | Public                 | National Referral | KAMPALA   | Central  | Nurse  | Registered Nurse         | Female     | 32      | 50YR FEMALE PATIENT GOT NEVIRAPINE (ORAL) HYPERSENSITIVITY INVOLVING ALL MUCUS MEMBRANES,SEVERE BUT RESOLVED            |
| 191                         | 2004 | Public                 | National Referral | KAMPALA   | Central  | Doctor |                          | Female     | 32      | 36YR MALE ADMITTED WITH SJS FOLLOWING INITIATION OF ORAL NEVIRAPINE,SEVERE EVENT*                                       |
|                             | 2019 | Private Not-for-Profit | Private Hospital  | WAKISO    | Central  | Doctor |                          | Male       | 27      | HIV+/FEMALE NEWLY ENROLLED ON HAART WITH NVP-BASED REGIMEN DEVELOPED SJS WHICH WAS SEVERE                               |
| 409                         | 1368 | Private For-Profit     | Private Hospital  | KIRYANDON | Other/NK | Other  |                          | Female     | 27      | 35YR/FEMALE, WITH CD4 100 CELLS/DL ON AZT/3TC/NVP,AFTER 2WEEKS SHE CAME BACK WITH A SEVERE GENERALIZED BODY RASH        |
| 1057                        | 1088 | Public                 | District Hospital | TORORO    | Eastern  | Nurse  | Registered Nurse         | Female     | 48      | 32YR/FEMALE ISS PATIENT ON AZT/3TC/NVP FOR 3 MONTHS GOT SKIN RASH ALL OVER THE BODY - STEVEN JOHNSON SYDROME - SEVERE   |
| 495                         | 863  | Private Not-for-Profit | Private Hospital  | KAMPALA   | Central  | Doctor |                          | Male       | 24      | 38YR OLD FEMALE WITH SEVERE NEVIRAPINE HYPERSENSITIVITY                                                                 |
| 910                         | 1202 | Private For-Profit     | Private Hospital  | MBRA      | Other/NK | Pharm  |                          | Male       | 27      | 24 YR-OLD WITH SKIN PEELING OFF DUE TO NEVIRAPINE, REACTION WAS SEVERE                                                  |
| 563                         | 781  | Public                 | District Hospital | MASINDI   | Other/NK | Other  |                          | Male       | 25      | 27YR OLD WITH 237 CD4 CELLS/ML ON NEVIRAPINE ORAL ROUTE GOT SEVERE RASH                                                 |
| 1158                        | 883  | Public                 | Regional Referral | MASAKA    | Other/NK | Nurse  | Registered Comprehensive | Female     |         | ORAL NEVIRAPINE, SEVERE HEADACHE, PATIENT STABILIZED                                                                    |

|                                           |      |                        |                   |         |          |        |                         |        |    |                                                                                                                                                                               |
|-------------------------------------------|------|------------------------|-------------------|---------|----------|--------|-------------------------|--------|----|-------------------------------------------------------------------------------------------------------------------------------------------------------------------------------|
| 951                                       | 136  | Public                 | Health Centre IV  |         | Other/NK | Pharm  |                         | Female | 27 | 35 YR-OLD ISS PATIENT ON AZT/3TC/NVP GOT SKIN RASH MORE SEVERE ON LOWER LIMBS & SKIN STARTED PEELING OFF, DID NOT RESPOND TO STEROIDS OR ANTIFUNGALS                          |
| 612                                       | 830  | Public                 | District Hospital | MASINDI | Other/NK | Nurse  | Registered Nurse        | Female | 33 | 45YR PATIENT ON ORAL TDF/3TC/NVP GOT SEVERE ABDOMINAL PAIN WHICH WAS IN COLICKY FORM                                                                                          |
| 1067                                      | 1098 | Public                 | District Hospital | TORORO  | Eastern  | Doctor |                         | Female | 28 | 4YR HIV+ CHILD ON PROTEASE INHIBITORS SWITCHED TO ORAL EFV - SEVERE BEHAVIORAL DISTURBANCE INCLUDING AGGRESSION, INSOMNIA & HYPERACTIVITY                                     |
| 423                                       | 419  | Private Not-for-Profit | Regional Referral | GULU    | Other/NK | Pharm  |                         | Female | 26 | 22YR/FEMALE LADY NURSE WHO GOT NEEDLE STICK INJURY & WAS INITIATED ON PEP WITH AZT/3TC-12 DAYS LATER GOT SEVERE RASH (SJS) & WAS ADMITTED AND TREATED                         |
| 603                                       | 821  | Public                 | District Hospital | MASINDI | Other/NK | Other  |                         | Male   | 38 | 35YR ON AZT-CONTAINING REGIMEN ORAL ROUTE DEVELOPED SEVERE ANAEMIA LEADING TO ADMISSION & BLOOD TRANSFUSION                                                                   |
| 987                                       | 1019 | Private Not-for-Profit | Private Hospital  | TORORO  | Eastern  | Nurse  | Enrolled Comprehensive  | Female | 22 | 38YR OLD IMMEDIATELY AFTER STARTING ORAL ARVS FELT LIKE HOT WATER HAD BEEN Poured ON HIM - SEVERE                                                                             |
| 69                                        | 922  | Public                 | National Referral | KAMPALA | Central  | Nurse  | Registered Nurse Midwif | Female |    | 30YR PATIENT REACTED TO ART ADMINISTERED ORALLY. PATIENT LOST SKIN & MUCUS MEMBRANES-SEVERE                                                                                   |
| <b>Antimalarials Only</b>                 |      |                        |                   |         |          |        |                         |        |    |                                                                                                                                                                               |
| 986                                       | 1017 | Private Not-for-Profit | Private Hospital  | TORORO  | Eastern  | Nurse  | Enrolled Comprehensive  | Male   | 24 | 2YR OLD GIVEN IM QUININE DEVELOPED HYPOGLYCAEMIA - IMPROVED AFTER MANAGEMENT - SEVERE                                                                                         |
| 914                                       | 1206 | Private Not-for-Profit | Private Hospital  | MBRA    | Other/NK | Nurse  | Enrolled Nurse          | Female | 60 | 17YR-OLD ON IM QNN WITH POST INJECTION PARALYSIS, IT WAS SEVERE                                                                                                               |
| 26                                        | 1810 | Private For-Profit     | Health Centre III | KAMPALA | Central  | Doctor |                         | Male   | 35 | TINNITUS IN A 27YR-OLD AFTER IV QUININE. SEVERE (LED TO ALTERED CONSCIOUSNESS).                                                                                               |
| 888                                       | 1180 | Private Not-for-Profit | Private Hospital  | MBRA    | Other/NK | Nurse  | Enrolled Nurse          | Female | 50 | PATIENT ON ORAL QNN GOT SKIN RASH, TINNITUS, ABORTION, VERTIGO, NAUSEA, VOMITING, BLURRED VISION - SEVERE                                                                     |
| 570                                       | 788  | Private For-Profit     | Health Centre IV  | MASINDI | Other/NK | Doctor |                         | Male   | 62 | 62YR/FEMALE ON ORAL MEPHAQUINE GOT SEVERE HEADACHE WITH MENTAL CONFUSION & INSOMNIA                                                                                           |
| 49                                        | 902  | Public                 | Health Centre IV  | KAMPALA | Central  | Doctor |                         | Male   |    | SEVERE HYPOGLYCEMIA IN ADULT-DRUG WAS ARTESUNATE/AMODIAQUINE                                                                                                                  |
| 359                                       | 97   | Private Not-for-Profit | Other             | BUIKWE  | Central  | Doctor |                         | Male   | 52 | PATIENT 52YR B/S +VE FOR MALARIA PARASITES. GIVEN COARTEM FOR THREE DAYS' TREATMENT, AFTER 1 DAY GOT SKIN ITCHING & SEVERE RASH. STOPPED DRUG, GAVE IV QNN & PATIENT IMPROVED |
| <b>Antibacterials &amp; Antimalarials</b> |      |                        |                   |         |          |        |                         |        |    |                                                                                                                                                                               |
| 160                                       | 1874 | Private For-Profit     | Health Centre IV  | KAMPALA | Central  | Doctor |                         | Female |    | 19YR FEMALE PATIENT WITH MALARIA & COUGH REACTED SEVERELY TO COMBINATION OF QNN-IV & ORAL SEPTRIN. MANAGED WITH PARENTERAL HYDROCORTISONE                                     |
| 996                                       | 1027 | Private Not-for-Profit | Private Hospital  | TORORO  | Eastern  | Nurse  | Enrolled Comprehensive  | Female | 30 | 5YR OLD GIRL FROM A CLINIC WHERE SHE WAS PUT ON IV QUININE & SEPTRIN. GOT BLISTERS ALL OVER THE BODY & DIED ON ADMISSION - SEVERE                                             |
| 988                                       | 1020 | Private Not-for-Profit | Private Hospital  | TORORO  | Eastern  | Nurse  | Enrolled Comprehensive  | Female | 27 | 8YR OLD GIRL REFERRED FROM A CLINIC AFTER RECEIVING IV QUININE & SEPTRIN DEVELOPED BLISTERS ALL-OVER THE BODY & DIED ON ADMISSION - SEVERE                                    |
| 1047                                      | 1078 | Private Not-for-Profit | Private Hospital  | TORORO  | Eastern  | Nurse  | Nursing Assistant       | Female | 29 | 5YR OLD GIRL WAS REFERRED FROM A CLINIC AFTER TAKING IV QUININE & SEPTRIN WITH BLISTERS ALL-OVER THE BODY. SHE DIED ON ADMISSION - SEVERE                                     |
| 253                                       | 994  | Public                 | National Referral | KAMPALA | Central  | Nurse  | Registered Nurse Midwif | Female | 60 | ADULT SEVERELY REACTED TO SEPTRIN AND TB DRUGS TAKEN ORALLY                                                                                                                   |
| <b>Analgesics Only</b>                    |      |                        |                   |         |          |        |                         |        |    |                                                                                                                                                                               |
| 278                                       | 2029 | Private For-Profit     | Private Hospital  | KAMPALA | Central  | Doctor |                         | Male   | 28 | ORAL DICLOFENAC 50MG, HAEMOPTYSIS AFTER 2 DAYS - WAS SEVERE*                                                                                                                  |

|                               |      |                        |                   |         |          |        |                          |        |    |                                                                                                                                                             |
|-------------------------------|------|------------------------|-------------------|---------|----------|--------|--------------------------|--------|----|-------------------------------------------------------------------------------------------------------------------------------------------------------------|
| 332                           | 1672 | Private For-Profit     | Private Hospital  | KAMPALA | Central  | Other  |                          | Male   | 30 | ORAL ROUTE OF TRAMADOL RESULTED INTO SEVERE ITCHY SORES ALL-OVER THE BODY THAT PERSISTED                                                                    |
| <b>Other Medications</b>      |      |                        |                   |         |          |        |                          |        |    |                                                                                                                                                             |
| 1162                          | 887  | Public                 | Health Centre IV  | MASAKA  | Other/NK | Pharm  |                          | Male   | 30 | 40YR OLD SEVERE HEADACHE AFTER ORAL LOSARTAN                                                                                                                |
| 429                           | 425  | Private Not-for-Profit | Private Hospital  | GULU    | Other/NK | Nurse  | Enrolled Comprehensive   | Male   | 26 | 13YR/MALE ON PREDNISOLONE ORAL ROUTE GOT SEVERE EPIGASTRIC PAIN WHICH WAS MANAGED AS SEVERE STEROID-INDUCED GASTRITIS                                       |
|                               | 833  | Public                 | National Referral | KAMPALA | Central  | Nurse  | Registered Nurse Midwif  | Female | 31 | SEVERE PALPITATIONS DUE TO OVER DOSE OF OMEPRAZOLE                                                                                                          |
|                               | 1241 | Public                 | National Referral | KAMPALA | Central  | Nurse  | Registered Nurse         | Female | 45 | PATIENT RECEIVED IV METHOTREXATE, ADRIANYCIN & VINCRISTINE GOT SEVERE DIARRHOEA, ORAL STOMATITIS (NEUTROPENIC)                                              |
| 234                           | 978  | Private For-Profit     | Other             | KAMPALA | Central  | Doctor |                          | Male   | 32 | 35YR/MALE ON IV LIGNOCAINE & ADRENALINE. GOT SWOLLEN & WAS FAILING TO BREATH-SEVERE                                                                         |
| 498                           | 1004 | Private For-Profit     | Private Hospital  | KAMPALA | Central  | Nurse  | Enrolled Nurse           | Female | 29 | LADY IN LATE TWENTIES GIVEN IV HYDROCORTISONE,GOT SEVERE BURNING SENSATION IN PRIVATE PARTS IMMEDIATELY AFTER ADMINISTRATION OF THE DRUG                    |
| 1056                          | 1087 | Public                 | District Hospital | TORORO  | Eastern  | Nurse  | Registered Mental Health | Female | 32 | 18YR/MALE MAN TAKING ORAL PHENORBABITONE GOT RASHES ALL OVER THE BODY SEVERE                                                                                |
|                               | 1248 | Public                 | National Referral | KAMPALA | Central  | Nurse  | Registered Nurse         | Female | 25 | SEVERE MUCOSITIS IN PATIENTS WHO GOT 5-FLUOROURACIL (ANTICANCER AGENT)                                                                                      |
|                               | 1246 | Public                 | National Referral | KAMPALA | Central  | Nurse  | Registered Nurse Midwif  | Female | 45 | PATIENT AFTER CHEMOTHERAPHY GOT SEVERE SKIN REACTION AFTER 4WEEKS OF TREATMENT. SITE WAS LEFT HARD                                                          |
| <b>No Medication Reported</b> |      |                        |                   |         |          |        |                          |        |    |                                                                                                                                                             |
|                               | 406  | Public                 | National Referral | KAMPALA | Central  | Doctor |                          | Male   | 26 | SEVERE PRURITUS                                                                                                                                             |
| 228                           | 972  | Public                 | National Referral | KAMPALA | Central  | Doctor |                          | Male   | 38 | 80YR/FEMALE WITH GENERALIZED SKIN ERUPTIONS & WOUNDS, NOT SURE OF DRUG BUT IT WAS SEVERE. ROUTE - ORAL.                                                     |
|                               | 1243 | Public                 | National Referral | KAMPALA | Central  | Nurse  | Registered Mental Health | Female | 40 | EXTENSIVE ORAL SORES WITH SEVERE DIARRHOEA &GENERALISED BODY RASH                                                                                           |
| 247                           | 1259 | Public                 | National Referral | KAMPALA | Central  | Doctor |                          | Male   |    | 25YR WITH SEVERE ADR THAT THE SKIN & MUCOUS MEMBRANES WITH REDDENING OF EYES                                                                                |
| 174                           | 68   | Private Not-for-Profit | Private Hospital  | KAMPALA | Central  | Nurse  | Enrolled Midwife         | Female | 28 | PATIENT WAS COMPLAINING OF SEVERE HEADACHE & I REFERED HIM TO A MEDICAL OFFICER                                                                             |
| 504                           | 1010 | Private Not-for-Profit | Private Hospital  | WAKISO  | Central  | Other  |                          | Male   |    | GENERALISED BODY RASH WITH SORES IN 30YR OLD MALE. REACTION WAS SEVERE                                                                                      |
|                               | 1218 | Public                 | National Referral | KAMPALA | Central  | Nurse  | Registered Nurse         | Female | 26 | SEVERE NEUTROPENIA WITH VERY HIGH UNCONTROLLED TEMPERATURE, SEVERE MUCOSITIS, EXCESSIVE VOMITING, EXCESSIVE WEIGHT LOSS & MALNUTRITION,TUMOR LYSIS SYNDROME |

**KEY**

ADR = ADVERSE DRUG REACTION

ART = ANTIRETROVIRAL THERAPY

ARVS = ANTIRETROVIRAL DRUGS

AZT = ZIDOVUDINE

EFV = EFAVIRENZ

3TC = LAMIVUDINE

ISS = IMMUNOSUPRESSED SYNDROME

IV = INTRAVENOUS

NVP = NEVIRAPINE

MEPHAQUINE = MEFLOQUINE

SEPTRIN = COTRIMOXAZOLE

SJS = STEVENS-JOHNSON SYNDROME

TDF = TENOFOVIR

UTI = URINARY TRACT INFECTION

\* = CHECK APPENDIX - 2 OR MORE ADVERSE REACTIONS DESCRIBED
